# Supplementary material for: miR-9-5p in Nephrectomy Specimens is a Potential Predictor of Primary Resistance to First-Line Treatment with Tyrosine Kinase Inhibitors in Patients with Metastatic Renal Cell Carcinoma
Source: Cancers (Basel). 2018 Sep 10;10(9):321. doi: 10.3390/cancers10090321 (PMC6162741; doi:10.3390/cancers10090321)
Supplement: Supplementary file 1 [file cancers-10-00321-s001.pdf]

# Supplementary Materials: miR-9-5p in Nephrectomy Specimens is a Potential Predictor of Primary Resistance to First-Line Treatment with Tyrosine Kinase Inhibitors in Patients with Metastatic Renal Cell Carcinoma

Bernhard Ralla Jonas Busch, Anne Flörcken, Jörg Westermann, Zhongwei Zhao, Ergin Kilic <sup>3</sup>, Sabine Weickmann, Monika Jung, Annika Fendler and Klaus Jung

|                                                                                                                    |     |
|--------------------------------------------------------------------------------------------------------------------|-----|
| Information S1: TaqMan® Array Human MicroRNA Cards for discovery and miRNA selection for validation .....          | S2  |
| Table S1. TaqMan MicroRNA Array data ranked according to Cq differences.....                                       | S2  |
| Information S2: Methodologies of RT-qPCR and digital PCR.....                                                      | S9  |
| General comments regarding the PCR guidelines and RNA quality data .....                                           | S9  |
| Table S2. MIQE checklist according to Bustin et al. ....                                                           | S9  |
| Table S3. Digital MIQE checklist according to Huggett et al. ....                                                  | S13 |
| Pre-testing step: RT-qPCR analyses with the LightCycler 480 .....                                                  | S16 |
| Table S4. TaqMan miRNA assays for RT-qPCR and dd PCR.....                                                          | S16 |
| cDNA synthesis.....                                                                                                | S17 |
| Quantitative real-time PCR .....                                                                                   | S17 |
| Performance data of RT-qPCR analyses .....                                                                         | S17 |
| Figure S1. Characteristics of PCR standard curves .....                                                            | S18 |
| Table S5. Reproducibility of miRNA measurements .....                                                              | S19 |
| Figure S2. Correlation between Array data and RT-qPCR data.....                                                    | S19 |
| Validation step: Droplet digital PCR with the QX200 digital PCR instrument.....                                    | S20 |
| Methodical details of the droplet digital PCR.....                                                                 | S20 |
| Table S6: Measurement conditions of dd PCR analyses.....                                                           | S20 |
| Figure S3. Fluorescence scatter plots of the dd PCR assays.....                                                    | S22 |
| Table S7. Parameter $\lambda$ given as median copies per partition.....                                            | S24 |
| Performance data of the droplet digital PCR analyses .....                                                         | S25 |
| Table S8. Repeatability and reproducibility data .....                                                             | S25 |
| Expression and correlation data .....                                                                              | S26 |
| Figure S4. Expression of miRNAs in tumor samples of RCC patients compared to normal adjacent renal parenchyma..... | S26 |
| Table S9. Spearman rank correlations between pathological variables and miRNAs .....                               | S27 |
| Table S10. List of validated target genes of miR-9-5p.....                                                         | S27 |
| References in the supplementary materials .....                                                                    | S33 |

**Information S1:** TaqMan® Array Human MicroRNA Cards for discovery and miRNA selection for validation.

As described in Materials and methods, TaqMan® Array Human MicroRNA A+B Cards Set v3.0 (Thermo Fisher Scientific, Waltham, MA, USA; Cat. No: 4444913) were used in the first step for the identification of differentially expressed miRNAs in primary RCC tissue samples depending on the response status to TKIs. In total, 754 human miRNAs and 4 snRNAs as multi-controls can be determined on these two microfluidic cards (A and B). For that purpose, two RNA sample pools consisting of equal RNA aliquots from ten sensitive (responders) and ten resistant (non-responders) patients to the sunitinib treatment were prepared. A multiplexed cDNA synthesis was performed. One µg RNA per three µL RNA pool was reverse-transcribed with components of the TaqMan MicroRNA Reverse Transcription Kit (Thermo Fisher; Cat. No. 4366596) and the Megaplex RT Primers, Human Pools Set v3.0 (Cat. No. 4444745) with pool A v2.1 and pool B v3.0. Tubes with a final megaplexed RT reaction volume of 7.5 µL were incubated in a Block Thermal cycler (Biometra, Göttingen, Germany) according to the Megaplex Pools Protocol without pre-amplification step (Thermo Fisher; PN 4399721). Then, six µL of the megaplex-pool-specific cDNAs were mixed with TaqMan® Universal PCR Master Mix, No AmpErase® UNG, 2x (Cat. No. 4364343) and nuclease-free water (5Prime, Hamburg, Germany, Cat. No. 2500000) to a final volume of 900 µL. Each of the 8 ports of the TaqMan MicroRNA array card was filled with 100 µL PCR reaction mix. After array centrifugation and sealing, the arrays were measured on the real-time PCR system ViiA7 (Thermo Fisher Scientific) under default thermal-cycling conditions for the 384 well TaqMan microRNA array cards. Cq values were generated by the SDS software v2.3 and were exported for further calculations. For the detection of differentially expressed miR, delta Cqs of the corresponding miRNAs were calculated. Undetermined and very low expressed miRNAs (Cq >34.0 in both groups), were eliminated so that 309 miRNAs remained for further calculations. These miRNAs were ranked according to the Cq differences between both groups summarized in Table S1. Using a Cq difference of ≥1.5 corresponding a fold change of 2.82, 11 up- and 35 down-regulated miRNAs between non-responders and responders were identified. We selected 11 miRs (miR-9-5p, miR-20b-5p, miR-203a-3p, miR-204-5p, miR-223-3p, miR-342-3p, miR-483-5p, miR-489-3p, miR-500a-5p, miR-885-5p, and miR-1269a; miRBase 22 release, <http://mirbase.org>) with good PCR curves on the array cards for further validation.

**Supplementary Table S1.** TaqMan MicroRNA Array data ranked according to the Cq-value differences between sunitinib non-responders and responders. The selected miRNAs according to the mentioned criteria used in the first validation step running on the LightCycler are marked in the last column.

| miR-Name<br>AB-Assay ID | Cq-Value<br>Responder (R) | Cq-Value<br>Non-Responder | Delta Cq<br>R-(non-R) | miR-Regulation<br>(Non-R to R)<br>One-Sided with<br>Cq<33 | Assays Run<br>on LC480 |
|-------------------------|---------------------------|---------------------------|-----------------------|-----------------------------------------------------------|------------------------|
| hsa-miR-9-000583        | 31.26                     | 26.79                     | 4.5                   | up                                                        | X                      |
| hsa-miR-583-001623      | 36.91                     | 32.79                     | 4.1                   | up                                                        | -                      |
| hsa-miR-9#-002231       | 34.20                     | 30.70                     | 3.5                   | up                                                        | -                      |
| hsa-miR-483-5p-002338   | 32.60                     | 30.49                     | 2.1                   | up                                                        | X                      |
| hsa-miR-125a-3p-002199  | 35.10                     | 33.17                     | 1.9                   | up                                                        | -                      |
| hsa-miR-338-3p-002252   | 33.97                     | 32.12                     | 1.9                   | up                                                        | -                      |
| hsa-miR-483-3p-002339   | 31.17                     | 29.32                     | 1.9                   | up                                                        | -                      |
| hsa-miR-584-001624      | 33.55                     | 31.70                     | 1.8                   | up                                                        | -                      |
| hsa-miR-885-5p-002296   | 31.82                     | 30.11                     | 1.7                   | up                                                        | X                      |
| hsa-miR-1247-002893     | 30.43                     | 28.83                     | 1.6                   | up                                                        | -                      |
| hsa-miR-223-002295      | 24.66                     | 23.12                     | 1.5                   | up                                                        | X                      |
| hsa-miR-1300-002902     | 32.56                     | 31.16                     | 1.4                   | up                                                        |                        |
| hsa-miR-643-001594      | 33.44                     | 32.24                     | 1.2                   | up                                                        |                        |
| hsa-miR-1225-3P-002766  | 31.73                     | 30.53                     | 1.2                   | up                                                        |                        |

| miR-Name<br>AB-Assay ID | Cq-Value<br>Responder (R) | Cq-Value<br>Non-Responder | Delta Cq<br>R-(non-R) | miR-Regulation<br>(Non-R to R)<br>One-Sided with<br>Cq<33 | Assays Run<br>on LC480 |
|-------------------------|---------------------------|---------------------------|-----------------------|-----------------------------------------------------------|------------------------|
| hsa-miR-941-002183      | 33.43                     | 32.26                     | 1.2                   | up                                                        |                        |
| hsa-miR-431-001979      | 34.50                     | 33.34                     | 1.2                   | up                                                        |                        |
| hsa-miR-539-001286      | 34.52                     | 33.38                     | 1.1                   | up                                                        |                        |
| hsa-miR-20a#-002437     | 34.11                     | 32.98                     | 1.1                   | up                                                        |                        |
| hsa-miR-1248-002870     | 33.79                     | 32.67                     | 1.1                   | up                                                        |                        |
| hsa-miR-212-000515      | 33.99                     | 32.89                     | 1.1                   | up                                                        |                        |
| hsa-miR-143#-002146     | 31.32                     | 30.24                     | 1.1                   | up                                                        |                        |
| hsa-miR-638-001582      | 32.92                     | 31.87                     | 1.1                   | up                                                        |                        |
| hsa-miR-338-5P-002658   | 34.30                     | 33.30                     | 1.0                   | up                                                        |                        |
| hsa-miR-769-5p-001998   | 31.97                     | 30.97                     | 1.0                   | up                                                        |                        |
| hsa-miR-181a-2#-002317  | 32.52                     | 31.53                     | 1.0                   | up                                                        |                        |
| hsa-miR-572-001614      | 34.40                     | 33.41                     | 1.0                   | up                                                        |                        |
| hsa-miR-625-002431      | 34.12                     | 33.21                     | 0.9                   | up                                                        |                        |
| hsa-miR-1228#-002763    | 30.17                     | 29.27                     | 0.9                   | up                                                        |                        |
| hsa-miR-301b-002392     | 34.75                     | 33.85                     | 0.9                   | up                                                        |                        |
| hsa-miR-193b#-002366    | 34.38                     | 33.50                     | 0.9                   | up                                                        |                        |
| hsa-miR-199a-000498     | 34.18                     | 33.40                     | 0.8                   | up                                                        |                        |
| hsa-let-7e-002406       | 27.71                     | 26.97                     | 0.7                   | up                                                        |                        |
| hsa-miR-566-001533      | 30.80                     | 30.06                     | 0.7                   | up                                                        |                        |
| hsa-miR-142-3p-000464   | 26.18                     | 25.49                     | 0.7                   | up                                                        |                        |
| hsa-miR-424-000604      | 32.67                     | 31.98                     | 0.7                   | up                                                        |                        |
| hsa-miR-511-001111      | 34.56                     | 33.88                     | 0.7                   | up                                                        |                        |
| hsa-miR-200c-002300     | 30.22                     | 29.55                     | 0.7                   | up                                                        |                        |
| hsa-miR-190b-002263     | 34.09                     | 33.43                     | 0.7                   | up                                                        |                        |
| hsa-miR-636-002088      | 33.55                     | 32.89                     | 0.7                   | up                                                        |                        |
| hsa-miR-376a-000565     | 33.08                     | 32.43                     | 0.7                   | up                                                        |                        |
| hsa-miR-324-3p-002161   | 30.07                     | 29.43                     | 0.6                   | up                                                        |                        |
| hsa-miR-378-000567      | 34.02                     | 33.43                     | 0.6                   | up                                                        |                        |
| hsa-miR-376c-002122     | 30.22                     | 29.65                     | 0.6                   | up                                                        |                        |
| hsa-miR-144#-002148     | 32.52                     | 31.98                     | 0.5                   | up                                                        |                        |
| hsa-miR-29a#-002447     | 33.94                     | 33.40                     | 0.5                   | up                                                        |                        |
| hsa-miR-519e#-001166    | 33.47                     | 32.95                     | 0.5                   | up                                                        |                        |
| hsa-miR-199a-3p-002304  | 27.72                     | 27.20                     | 0.5                   | up                                                        |                        |
| hsa-miR-577-002675      | 34.10                     | 33.59                     | 0.5                   | up                                                        |                        |
| hsa-miR-98-000577       | 33.23                     | 32.73                     | 0.5                   | up                                                        |                        |
| hsa-miR-1275-002840     | 28.81                     | 28.31                     | 0.5                   | up                                                        |                        |
| hsa-miR-1255B-002801    | 33.33                     | 32.83                     | 0.5                   | up                                                        |                        |
| hsa-miR-328-000543      | 32.31                     | 31.86                     | 0.4                   | up                                                        |                        |
| hsa-miR-142-5p-002248   | 31.93                     | 31.49                     | 0.4                   | up                                                        |                        |
| hsa-miR-659-001514      | 33.05                     | 32.62                     | 0.4                   | up                                                        |                        |
| hsa-miR-192#-002272     | 32.70                     | 32.27                     | 0.4                   | up                                                        |                        |
| hsa-miR-1291-002838     | 32.75                     | 32.33                     | 0.4                   | up                                                        |                        |
| hsa-miR-335#-002185     | 32.63                     | 32.23                     | 0.4                   | up                                                        |                        |
| hsa-miR-661-001606      | 29.08                     | 28.70                     | 0.4                   | up                                                        |                        |
| hsa-miR-24-2#-002441    | 33.91                     | 33.55                     | 0.4                   | up                                                        |                        |
| hsa-miR-425-5p-001516   | 29.25                     | 28.90                     | 0.4                   | up                                                        |                        |
| hsa-miR-1285-002822     | 31.33                     | 31.00                     | 0.3                   | up                                                        |                        |
| hsa-miR-125b-000449     | 26.76                     | 26.42                     | 0.3                   | up                                                        |                        |
| hsa-miR-592-001546      | 31.09                     | 30.76                     | 0.3                   | up                                                        |                        |
| hsa-miR-502-3p-002083   | 34.24                     | 33.92                     | 0.3                   | up                                                        |                        |

| miR-Name<br>AB-Assay ID | Cq-Value<br>Responder (R) | Cq-Value<br>Non-Responder | Delta Cq<br>R-(non-R) | miR-Regulation<br>(Non-R to R)<br>One-Sided with<br>Cq<33 | Assays Run<br>on LC480 |
|-------------------------|---------------------------|---------------------------|-----------------------|-----------------------------------------------------------|------------------------|
| hsa-miR-15b#-002173     | 31.38                     | 31.06                     | 0.3                   | up                                                        |                        |
| hsa-miR-1270-002807     | 32.91                     | 32.60                     | 0.3                   | up                                                        |                        |
| hsa-miR-214-002306      | 28.86                     | 28.55                     | 0.3                   | up                                                        |                        |
| hsa-miR-411-001610      | 32.68                     | 32.40                     | 0.3                   | up                                                        |                        |
| hsa-miR-301-000528      | 31.35                     | 31.09                     | 0.3                   | up                                                        |                        |
| hsa-miR-155-002623      | 25.97                     | 25.71                     | 0.3                   | up                                                        |                        |
| hsa-miR-423-5p-002340   | 31.39                     | 31.14                     | 0.3                   | up                                                        |                        |
| hsa-miR-200b-002251     | 27.02                     | 26.78                     | 0.2                   | up                                                        |                        |
| hsa-let-7c-000379       | 31.65                     | 31.42                     | 0.2                   | up                                                        |                        |
| hsa-miR-150-000473      | 26.19                     | 25.97                     | 0.2                   | up                                                        |                        |
| hsa-miR-145#-002149     | 32.36                     | 32.14                     | 0.2                   | up                                                        |                        |
| hsa-miR-34a-000426      | 25.84                     | 25.62                     | 0.2                   | up                                                        |                        |
| hsa-miR-22#-002301      | 33.05                     | 32.85                     | 0.2                   | up                                                        |                        |
| hsa-miR-1227-002769     | 33.55                     | 33.36                     | 0.2                   | up                                                        |                        |
| hsa-miR-22-000398       | 25.98                     | 25.79                     | 0.2                   | up                                                        |                        |
| hsa-miR-24-000402       | 22.45                     | 22.29                     | 0.2                   | up                                                        |                        |
| hsa-miR-21-000397       | 22.47                     | 22.32                     | 0.2                   | up                                                        |                        |
| hsa-miR-370-002275      | 33.41                     | 33.27                     | 0.1                   | up                                                        |                        |
| hsa-let-7b-002619       | 26.59                     | 26.45                     | 0.1                   | up                                                        |                        |
| hsa-miR-136#-002100     | 34.04                     | 33.91                     | 0.1                   | up                                                        |                        |
| hsa-miR-33a#-002136     | 33.17                     | 33.05                     | 0.1                   | up                                                        |                        |
| hsa-miR-224-002099      | 30.23                     | 30.10                     | 0.1                   | up                                                        |                        |
| hsa-miR-19b-000396      | 23.34                     | 23.24                     | 0.1                   | up                                                        |                        |
| hsa-miR-106a-002169     | 24.32                     | 24.23                     | 0.1                   | up                                                        |                        |
| mean RNU44-001094       | 25.83                     | 25.74                     | 0.1                   | up                                                        |                        |
| hsa-let-7i#-002172      | 32.85                     | 32.77                     | 0.1                   | up                                                        |                        |
| hsa-miR-1253-002894     | 32.19                     | 32.11                     | 0.1                   | up                                                        |                        |
| hsa-miR-1274A-002883    | 22.41                     | 22.33                     | 0.1                   | up                                                        |                        |
| hsa-miR-346-000553      | 32.38                     | 32.30                     | 0.1                   | up                                                        |                        |
| hsa-miR-574-3p-002349   | 28.70                     | 28.63                     | 0.1                   | up                                                        |                        |
| hsa-miR-28-000411       | 29.29                     | 29.25                     | 0.0                   | =                                                         |                        |
| hsa-miR-628-5p-002433   | 32.01                     | 31.96                     | 0.0                   | =                                                         |                        |
| hsa-miR-15a-000389      | 28.66                     | 28.62                     | 0.0                   | =                                                         |                        |
| hsa-miR-218-000521      | 29.46                     | 29.43                     | 0.0                   | =                                                         |                        |
| hsa-miR-1183-002841     | 31.79                     | 31.76                     | 0.0                   | =                                                         |                        |
| hsa-miR-183#-002270     | 33.90                     | 33.87                     | 0.0                   | =                                                         |                        |
| hsa-miR-99b#-002196     | 32.88                     | 32.86                     | 0.0                   | =                                                         |                        |
| hsa-miR-31-002279       | 26.49                     | 26.48                     | 0.0                   | =                                                         |                        |
| hsa-miR-365-001020      | 30.64                     | 30.62                     | 0.0                   | =                                                         |                        |
| hsa-miR-151-3p-002254   | 26.63                     | 26.63                     | 0.0                   | =                                                         |                        |
| hsa-miR-505#-002087     | 32.85                     | 32.85                     | 0.0                   | =                                                         |                        |
| hsa-miR-939-002182      | 25.88                     | 25.88                     | 0.0                   | =                                                         |                        |
| hsa-miR-652-002352      | 30.33                     | 30.33                     | 0.0                   | =                                                         |                        |
| hsa-miR-19b-1#-002425   | 33.94                     | 33.97                     | 0.0                   | =                                                         |                        |
| hsa-miR-144-002676      | 31.77                     | 31.80                     | 0.0                   | =                                                         |                        |
| hsa-miR-135b-002261     | 28.27                     | 28.30                     | 0.0                   | =                                                         |                        |
| hsa-miR-214#-002293     | 32.17                     | 32.20                     | 0.0                   | =                                                         |                        |
| hsa-miR-1303-002792     | 33.13                     | 33.17                     | 0.0                   | =                                                         |                        |
| hsa-miR-494-002365      | 24.89                     | 24.95                     | -0.1                  | down                                                      |                        |
| hsa-let-7g-002282       | 27.35                     | 27.42                     | -0.1                  | down                                                      |                        |

| miR-Name<br>AB-Assay ID | Cq-Value<br>Responder (R) | Cq-Value<br>Non-Responder | Delta Cq<br>R-(non-R) | miR-Regulation<br>(Non-R to R)<br>One-Sided with<br>Cq<33 | Assays Run<br>on LC480 |
|-------------------------|---------------------------|---------------------------|-----------------------|-----------------------------------------------------------|------------------------|
| hsa-miR-185-002271      | 30.18                     | 30.25                     | -0.1                  | down                                                      |                        |
| hsa-miR-34b-002102      | 32.85                     | 32.92                     | -0.1                  | down                                                      |                        |
| hsa-miR-126#-000451     | 26.67                     | 26.75                     | -0.1                  | down                                                      |                        |
| hsa-miR-1233-002768     | 28.24                     | 28.32                     | -0.1                  | down                                                      |                        |
| hsa-miR-766-001986      | 30.38                     | 30.46                     | -0.1                  | down                                                      |                        |
| hsa-miR-335-000546      | 32.31                     | 32.40                     | -0.1                  | down                                                      |                        |
| hsa-miR-191-002299      | 24.85                     | 24.94                     | -0.1                  | down                                                      |                        |
| hsa-miR-486-001278      | 30.14                     | 30.24                     | -0.1                  | down                                                      |                        |
| hsa-miR-424#-002309     | 32.13                     | 32.25                     | -0.1                  | down                                                      |                        |
| hsa-let-7g#-002118      | 33.42                     | 33.57                     | -0.1                  | down                                                      |                        |
| hsa-miR-532-3p-002355   | 31.17                     | 31.33                     | -0.2                  | down                                                      |                        |
| hsa-miR-200a-000502     | 27.46                     | 27.63                     | -0.2                  | down                                                      |                        |
| hsa-miR-125a-5p-002198  | 27.72                     | 27.88                     | -0.2                  | down                                                      |                        |
| hsa-miR-15b-000390      | 30.31                     | 30.50                     | -0.2                  | down                                                      |                        |
| hsa-miR-99b-000436      | 28.75                     | 28.94                     | -0.2                  | down                                                      |                        |
| hsa-miR-193a-3p-002250  | 31.55                     | 31.75                     | -0.2                  | down                                                      |                        |
| hsa-miR-95-000433       | 31.39                     | 31.59                     | -0.2                  | down                                                      |                        |
| hsa-miR-16-1#-002420    | 33.22                     | 33.42                     | -0.2                  | down                                                      |                        |
| hsa-miR-10a-000387      | 28.59                     | 28.79                     | -0.2                  | down                                                      |                        |
| hsa-miR-148a-000470     | 29.10                     | 29.31                     | -0.2                  | down                                                      |                        |
| hsa-miR-145-002278      | 25.43                     | 25.65                     | -0.2                  | down                                                      |                        |
| hsa-miR-17-002308       | 24.24                     | 24.46                     | -0.2                  | down                                                      |                        |
| hsa-miR-509-5p-002235   | 32.51                     | 32.73                     | -0.2                  | down                                                      |                        |
| mean U6 snRNA-001973    | 19.86                     | 20.11                     | -0.3                  | down                                                      |                        |
| hsa-miR-122-002245      | 30.44                     | 30.71                     | -0.3                  | down                                                      |                        |
| hsa-miR-487a-001279     | 31.71                     | 31.98                     | -0.3                  | down                                                      |                        |
| hsa-miR-664-002897      | 28.36                     | 28.63                     | -0.3                  | down                                                      |                        |
| hsa-miR-19a-000395      | 26.43                     | 26.72                     | -0.3                  | down                                                      |                        |
| hsa-miR-146b-001097     | 25.72                     | 26.03                     | -0.3                  | down                                                      |                        |
| hsa-miR-186#-002105     | 32.39                     | 32.71                     | -0.3                  | down                                                      |                        |
| hsa-miR-130b-000456     | 31.07                     | 31.39                     | -0.3                  | down                                                      |                        |
| hsa-miR-193a-5p-002281  | 30.14                     | 30.47                     | -0.3                  | down                                                      |                        |
| hsa-miR-590-5p-001984   | 28.91                     | 29.24                     | -0.3                  | down                                                      |                        |
| hsa-miR-497-001043      | 30.93                     | 31.26                     | -0.3                  | down                                                      |                        |
| hsa-miR-28-3p-002446    | 27.45                     | 27.79                     | -0.3                  | down                                                      |                        |
| hsa-let-7a-000377       | 30.01                     | 30.35                     | -0.3                  | down                                                      |                        |
| hsa-miR-34a#-002316     | 31.97                     | 32.31                     | -0.3                  | down                                                      |                        |
| hsa-miR-126-002228      | 21.54                     | 21.89                     | -0.3                  | down                                                      |                        |
| hsa-miR-143-002249      | 25.94                     | 26.30                     | -0.4                  | down                                                      |                        |
| hsa-miR-596-001550      | 27.16                     | 27.52                     | -0.4                  | down                                                      |                        |
| hsa-miR-106b-000442     | 27.50                     | 27.85                     | -0.4                  | down                                                      |                        |
| hsa-miR-331-000545      | 26.30                     | 26.66                     | -0.4                  | down                                                      |                        |
| hsa-miR-140-3p-002234   | 28.79                     | 29.16                     | -0.4                  | down                                                      |                        |
| hsa-miR-18b-002217      | 32.19                     | 32.56                     | -0.4                  | down                                                      |                        |
| hsa-miR-1201-002781     | 32.62                     | 32.99                     | -0.4                  | down                                                      |                        |
| hsa-miR-133a-002246     | 29.98                     | 30.36                     | -0.4                  | down                                                      |                        |
| hsa-miR-152-000475      | 28.42                     | 28.80                     | -0.4                  | down                                                      |                        |
| hsa-miR-103-000439      | 28.88                     | 29.27                     | -0.4                  | down                                                      |                        |
| hsa-miR-454-002323      | 27.33                     | 27.72                     | -0.4                  | down                                                      |                        |
| hsa-miR-141-000463      | 32.51                     | 32.91                     | -0.4                  | down                                                      |                        |

| miR-Name<br>AB-Assay ID | Cq-Value<br>Responder (R) | Cq-Value<br>Non-Responder | Delta Cq<br>R-(non-R) | miR-Regulation<br>(Non-R to R)<br>One-Sided with<br>Cq<33 | Assays Run<br>on LC480 |
|-------------------------|---------------------------|---------------------------|-----------------------|-----------------------------------------------------------|------------------------|
| hsa-miR-202-002363      | 32.26                     | 32.66                     | -0.4                  | down                                                      |                        |
| hsa-miR-20a-000580      | 25.35                     | 25.75                     | -0.4                  | down                                                      |                        |
| hsa-let-7d-002283       | 29.94                     | 30.35                     | -0.4                  | down                                                      |                        |
| hsa-miR-320-002277      | 26.40                     | 26.80                     | -0.4                  | down                                                      |                        |
| hsa-miR-25-000403       | 30.51                     | 30.93                     | -0.4                  | down                                                      |                        |
| hsa-miR-1290-002863     | 30.44                     | 30.85                     | -0.4                  | down                                                      |                        |
| hsa-miR-196b-002215     | 27.55                     | 27.97                     | -0.4                  | down                                                      |                        |
| hsa-miR-193b-002367     | 27.99                     | 28.42                     | -0.4                  | down                                                      |                        |
| hsa-miR-16-000391       | 23.48                     | 23.91                     | -0.4                  | down                                                      |                        |
| hsa-miR-571-001613      | 30.48                     | 30.91                     | -0.4                  | down                                                      |                        |
| hsa-miR-339-3p-002184   | 29.81                     | 30.26                     | -0.5                  | down                                                      |                        |
| hsa-miR-18a-002422      | 31.99                     | 32.45                     | -0.5                  | down                                                      |                        |
| hsa-miR-1260-002896     | 25.63                     | 26.10                     | -0.5                  | down                                                      |                        |
| hsa-miR-650-001603      | 29.40                     | 29.87                     | -0.5                  | down                                                      |                        |
| hsa-miR-340-002258      | 31.94                     | 32.42                     | -0.5                  | down                                                      |                        |
| hsa-miR-663B-002857     | 25.50                     | 25.99                     | -0.5                  | down                                                      |                        |
| hsa-miR-215-000518      | 28.34                     | 28.84                     | -0.5                  | down                                                      |                        |
| hsa-miR-337-5p-002156   | 33.29                     | 33.79                     | -0.5                  | down                                                      |                        |
| hsa-miR-195-000494      | 25.52                     | 26.03                     | -0.5                  | down                                                      |                        |
| hsa-miR-324-5p-000539   | 31.46                     | 31.98                     | -0.5                  | down                                                      |                        |
| hsa-miR-501-001047      | 30.27                     | 30.79                     | -0.5                  | down                                                      |                        |
| hsa-miR-1274B-002884    | 19.34                     | 19.87                     | -0.5                  | down                                                      |                        |
| hsa-miR-15a#-002419     | 32.37                     | 32.90                     | -0.5                  | down                                                      |                        |
| hsa-miR-99a-000435      | 26.41                     | 26.96                     | -0.5                  | down                                                      |                        |
| hsa-miR-29a-002112      | 22.82                     | 23.38                     | -0.6                  | down                                                      |                        |
| hsa-miR-31#-002113      | 29.58                     | 30.14                     | -0.6                  | down                                                      |                        |
| hsa-miR-132-000457      | 28.52                     | 29.09                     | -0.6                  | down                                                      |                        |
| hsa-miR-21#-002438      | 28.69                     | 29.27                     | -0.6                  | down                                                      |                        |
| hsa-miR-598-001988      | 32.58                     | 33.17                     | -0.6                  | down                                                      |                        |
| hsa-miR-101-002253      | 29.93                     | 30.52                     | -0.6                  | down                                                      |                        |
| hsa-miR-361-000554      | 32.39                     | 32.99                     | -0.6                  | down                                                      |                        |
| hsa-miR-649-001602      | 33.77                     | 34.38                     | -0.6                  | down                                                      |                        |
| hsa-miR-708-002341      | 30.10                     | 30.73                     | -0.6                  | down                                                      |                        |
| hsa-miR-130a-000454     | 29.21                     | 29.84                     | -0.6                  | down                                                      |                        |
| hsa-miR-429-001024      | 29.63                     | 30.27                     | -0.6                  | down                                                      |                        |
| hsa-miR-330-5p-002230   | 32.73                     | 33.37                     | -0.6                  | down                                                      |                        |
| hsa-miR-296-000527      | 31.83                     | 32.47                     | -0.6                  | down                                                      |                        |
| hsa-miR-10b-002218      | 27.52                     | 28.16                     | -0.6                  | down                                                      |                        |
| hsa-miR-30b-000602      | 26.17                     | 26.83                     | -0.7                  | down                                                      |                        |
| hsa-miR-1271-002779     | 31.37                     | 32.03                     | -0.7                  | down                                                      |                        |
| hsa-miR-590-3P-002677   | 30.51                     | 31.17                     | -0.7                  | down                                                      |                        |
| hsa-miR-139-5p-002289   | 30.29                     | 30.96                     | -0.7                  | down                                                      |                        |
| hsa-miR-213-000516      | 30.95                     | 31.62                     | -0.7                  | down                                                      |                        |
| hsa-miR-100-000437      | 26.41                     | 27.08                     | -0.7                  | down                                                      |                        |
| hsa-miR-194-000493      | 26.33                     | 27.01                     | -0.7                  | down                                                      |                        |
| hsa-miR-181a-000480     | 26.97                     | 27.65                     | -0.7                  | down                                                      |                        |
| hsa-miR-29b-000413      | 29.34                     | 30.02                     | -0.7                  | down                                                      |                        |
| hsa-miR-875-5p-002203   | 31.32                     | 32.00                     | -0.7                  | down                                                      |                        |
| hsa-miR-192-000491      | 25.65                     | 26.33                     | -0.7                  | down                                                      |                        |
| hsa-miR-484-001821      | 26.34                     | 27.04                     | -0.7                  | down                                                      |                        |

| miR-Name<br>AB-Assay ID | Cq-Value<br>Responder (R) | Cq-Value<br>Non-Responder | Delta Cq<br>R-(non-R) | miR-Regulation<br>(Non-R to R)<br>One-Sided with<br>Cq<33 | Assays Run<br>on LC480 |
|-------------------------|---------------------------|---------------------------|-----------------------|-----------------------------------------------------------|------------------------|
| hsa-miR-26b-000407      | 26.92                     | 27.63                     | -0.7                  | down                                                      |                        |
| hsa-miR-27a-000408      | 27.30                     | 28.04                     | -0.7                  | down                                                      |                        |
| hsa-miR-92a-000431      | 29.57                     | 30.31                     | -0.7                  | down                                                      |                        |
| hsa-miR-32-002109       | 32.34                     | 33.09                     | -0.8                  | down                                                      |                        |
| hsa-miR-455-001280      | 28.46                     | 29.22                     | -0.8                  | down                                                      |                        |
| hsa-miR-720-002895      | 19.54                     | 20.30                     | -0.8                  | down                                                      |                        |
| hsa-miR-374-000563      | 28.42                     | 29.22                     | -0.8                  | down                                                      |                        |
| hsa-miR-1180-002847     | 31.34                     | 32.16                     | -0.8                  | down                                                      |                        |
| hsa-let-7f-000382       | 30.10                     | 30.92                     | -0.8                  | down                                                      |                        |
| hsa-miR-10b#-002315     | 30.07                     | 30.89                     | -0.8                  | down                                                      |                        |
| hsa-miR-30d-000420      | 25.70                     | 26.54                     | -0.8                  | down                                                      |                        |
| hsa-miR-886-5p-002193   | 26.58                     | 27.42                     | -0.8                  | down                                                      |                        |
| hsa-miR-138-002284      | 31.57                     | 32.45                     | -0.9                  | down                                                      |                        |
| hsa-miR-455-3p-002244   | 32.18                     | 33.08                     | -0.9                  | down                                                      |                        |
| hsa-miR-542-5p-002240   | 32.42                     | 33.31                     | -0.9                  | down                                                      |                        |
| hsa-miR-151-5P-002642   | 29.93                     | 30.83                     | -0.9                  | down                                                      |                        |
| hsa-miR-1825-002907     | 28.43                     | 29.33                     | -0.9                  | down                                                      |                        |
| hsa-miR-30e-3p-000422   | 26.18                     | 27.09                     | -0.9                  | down                                                      |                        |
| hsa-miR-1244-002791     | 31.87                     | 32.78                     | -0.9                  | down                                                      |                        |
| hsa-miR-186-002285      | 27.44                     | 28.37                     | -0.9                  | down                                                      |                        |
| hsa-miR-595-001987      | 33.54                     | 34.48                     | -0.9                  | down                                                      |                        |
| hsa-miR-30c-000419      | 25.27                     | 26.21                     | -0.9                  | down                                                      |                        |
| hsa-miR-361-3p-002116   | 31.38                     | 32.35                     | -1.0                  | down                                                      |                        |
| hsa-miR-93#-002139      | 30.20                     | 31.17                     | -1.0                  | down                                                      |                        |
| hsa-miR-30d#-002305     | 31.10                     | 32.08                     | -1.0                  | down                                                      |                        |
| hsa-miR-362-3p-002117   | 32.35                     | 33.33                     | -1.0                  | down                                                      |                        |
| hsa-miR-210-000512      | 24.46                     | 25.44                     | -1.0                  | down                                                      |                        |
| hsa-miR-339-5p-002257   | 30.09                     | 31.08                     | -1.0                  | down                                                      |                        |
| hsa-miR-27b-000409      | 28.96                     | 29.95                     | -1.0                  | down                                                      |                        |
| hsa-miR-886-3p-002194   | 25.46                     | 26.48                     | -1.0                  | down                                                      |                        |
| hsa-miR-550-001544      | 31.18                     | 32.21                     | -1.0                  | down                                                      |                        |
| hsa-miR-628-3p-002434   | 33.81                     | 34.84                     | -1.0                  | down                                                      |                        |
| hsa-miR-133b-002247     | 33.11                     | 34.14                     | -1.0                  | down                                                      |                        |
| hsa-miR-149-002255      | 30.43                     | 31.48                     | -1.0                  | down                                                      |                        |
| hsa-miR-639-001583      | 31.34                     | 32.39                     | -1.0                  | down                                                      |                        |
| hsa-miR-567-001534      | 33.92                     | 34.97                     | -1.0                  | down                                                      |                        |
| hsa-miR-657-001512      | 33.01                     | 34.08                     | -1.1                  | down                                                      |                        |
| hsa-miR-660-001515      | 26.90                     | 27.98                     | -1.1                  | down                                                      |                        |
| hsa-miR-181c-000482     | 31.79                     | 32.88                     | -1.1                  | down                                                      |                        |
| hsa-miR-135a-000460     | 30.25                     | 31.36                     | -1.1                  | down                                                      |                        |
| hsa-miR-331-5p-002233   | 32.59                     | 33.72                     | -1.1                  | down                                                      |                        |
| hsa-miR-532-001518      | 28.71                     | 29.85                     | -1.1                  | down                                                      |                        |
| hsa-miR-378-002243      | 27.07                     | 28.22                     | -1.1                  | down                                                      |                        |
| hsa-miR-30a-5p-000417   | 24.24                     | 25.40                     | -1.2                  | down                                                      |                        |
| hsa-miR-106b#-002380    | 32.85                     | 34.02                     | -1.2                  | down                                                      |                        |
| hsa-miR-362-001273      | 31.11                     | 32.33                     | -1.2                  | down                                                      |                        |
| hsa-miR-148b#-002160    | 32.97                     | 34.21                     | -1.2                  | down                                                      |                        |
| hsa-miR-26a-000405      | 25.17                     | 26.43                     | -1.3                  | down                                                      |                        |
| hsa-miR-27b#-002174     | 32.96                     | 34.25                     | -1.3                  | down                                                      |                        |
| hsa-miR-29c-000587      | 27.12                     | 28.41                     | -1.3                  | down                                                      |                        |

| miR-Name<br>AB-Assay ID | Cq-Value<br>Responder (R) | Cq-Value<br>Non-Responder | Delta Cq<br>R-(non-R) | miR-Regulation<br>(Non-R to R)<br>One-Sided with<br>Cq<33 | Assays Run<br>on LC480 |
|-------------------------|---------------------------|---------------------------|-----------------------|-----------------------------------------------------------|------------------------|
| mean RNU48-001006       | 25.50                     | 26.84                     | -1.3                  | down                                                      |                        |
| hsa-miR-30a-3p-000416   | 25.15                     | 26.54                     | -1.4                  | down                                                      |                        |
| hsa-miR-148b-000471     | 31.77                     | 33.17                     | -1.4                  | down                                                      |                        |
| hsa-miR-92b#-002343     | 32.80                     | 34.20                     | -1.4                  | down                                                      |                        |
| hsa-miR-345-002186      | 29.36                     | 30.77                     | -1.4                  | down                                                      |                        |
| hsa-miR-146a-000468     | 25.71                     | 27.12                     | -1.4                  | down                                                      |                        |
| hsa-miR-23a-000399      | 31.07                     | 32.48                     | -1.4                  | down                                                      |                        |
| hsa-miR-23b-000400      | 30.95                     | 32.37                     | -1.4                  | down                                                      |                        |
| hsa-miR-127-000452      | 31.82                     | 33.25                     | -1.4                  | down                                                      |                        |
| hsa-miR-221-000524      | 28.54                     | 29.97                     | -1.4                  | down                                                      |                        |
| hsa-miR-629-001562      | 33.70                     | 35.16                     | -1.5                  | down                                                      | -                      |
| hsa-miR-1208-002880     | 32.31                     | 33.78                     | -1.5                  | down                                                      | -                      |
| hsa-miR-625#-002432     | 30.58                     | 32.04                     | -1.5                  | down                                                      | -                      |
| hsa-miR-744-002324      | 29.83                     | 31.29                     | -1.5                  | down                                                      | -                      |
| hsa-miR-450a-002303     | 32.82                     | 34.30                     | -1.5                  | down                                                      | -                      |
| hsa-miR-222-002276      | 25.20                     | 26.69                     | -1.5                  | down                                                      | -                      |
| hsa-miR-99a#-002141     | 31.63                     | 33.17                     | -1.5                  | down                                                      | -                      |
| hsa-miR-422a-002297     | 33.57                     | 35.17                     | -1.6                  | down                                                      | -                      |
| hsa-miR-197-000497      | 29.48                     | 31.10                     | -1.6                  | down                                                      | -                      |
| hsa-miR-26a-1#-002443   | 33.83                     | 35.45                     | -1.6                  | down                                                      | -                      |
| hsa-miR-452-002329      | 29.90                     | 31.58                     | -1.7                  | down                                                      | -                      |
| hsa-miR-622-001553      | 31.48                     | 33.22                     | -1.7                  | down                                                      | -                      |
| hsa-miR-520D-3P-002743  | 33.79                     | 35.54                     | -1.8                  | down                                                      | -                      |
| hsa-miR-597-001551      | 33.53                     | 35.29                     | -1.8                  | down                                                      | -                      |
| hsa-miR-17#-002421      | 32.89                     | 34.66                     | -1.8                  | down                                                      | -                      |
| hsa-miR-342-3p-002260   | 26.55                     | 28.38                     | -1.8                  | down                                                      | X                      |
| hsa-miR-190-000489      | 32.37                     | 34.23                     | -1.9                  | down                                                      | -                      |
| hsa-miR-675-002005      | 31.31                     | 33.19                     | -1.9                  | down                                                      | -                      |
| hsa-miR-222#-002097     | 31.48                     | 33.39                     | -1.9                  | down                                                      | -                      |
| hsa-miR-204-000508      | 26.24                     | 28.16                     | -1.9                  | down                                                      | X                      |
| hsa-miR-500-002428      | 31.20                     | 33.15                     | -1.9                  | down                                                      | X                      |
| hsa-miR-580-001621      | 33.09                     | 35.04                     | -2.0                  | down                                                      | -                      |
| hsa-miR-486-3p-002093   | 31.35                     | 33.33                     | -2.0                  | down                                                      | -                      |
| hsa-miR-200a#-001011    | 32.88                     | 34.90                     | -2.0                  | down                                                      | -                      |
| hsa-miR-548d-5p-002237  | 32.92                     | 35.07                     | -2.1                  | down                                                      | -                      |
| hsa-miR-1305-002867     | 32.79                     | 34.96                     | -2.2                  | down                                                      | -                      |
| hsa-miR-296-3p-002101   | 33.66                     | 35.86                     | -2.2                  | down                                                      | -                      |
| hsa-miR-545-002267      | 33.08                     | 35.44                     | -2.4                  | down                                                      | -                      |
| hsa-miR-564-001531      | 32.35                     | 34.81                     | -2.5                  | down                                                      | -                      |
| hsa-miR-20b-001014      | 28.44                     | 30.93                     | -2.5                  | down                                                      | X                      |
| hsa-miR-203-000507      | 31.14                     | 33.78                     | -2.6                  | down                                                      | X                      |
| hsa-miR-181c#-002333    | 31.43                     | 34.14                     | -2.7                  | down                                                      | -                      |
| hsa-miR-1269-002789     | 31.45                     | 34.25                     | -2.8                  | down                                                      | X                      |
| hsa-miR-644-001596      | 33.26                     | 36.19                     | -2.9                  | down                                                      | -                      |
| hsa-miR-489-002358      | 27.08                     | 30.58                     | -3.5                  | down                                                      | X                      |

**Information S2:** RT-qPCR and droplet digital PCR methodologies.**General comments regarding the PCR guidelines and RNA quality data.**

RT-qPCR measurements were performed according to the recommendations of the MIQE guidelines [1]. Corresponding comments are listed in the following checklist (Supplementary Table S2 and the Section "Pre-testing step: RT-qPCR with the LightCycler 480"). This also applies for the droplet digital PCR measurements according to the digital MIQE guidelines [2] shown in Supplementary Table S3 with corresponding comments and experimental details in the section "Validation step: Droplet digital PCR using the QX200 digital PCR instrument". No template controls (NTC) and no reverse-transcription controls (NRTC or no enzyme controls = NEC) were always performed and showed negative results.

RNA was extracted from formalin-fixed, paraffin-embedded (FFPE) tissue samples (mean:  $15.5 \pm 4.6$  mg). The median RNA yield from one mg of FFPE tissue sample amounted to 961 ng (95% CI, 529–1746 ng) for non-responders and 1217 ng (95% CI, 691–1859) for responders and did not differ between the two cohorts (Mann–Whitney U-test,  $P = 0.499$ ). The purity of isolated RNA samples defined by the 260 nm to 280 nm absorbance ratio (median, 95% CI 1.89, 1.84–1.92 for non-responders and 1.90, 1.85–1.93 for responders) also did not differ between the study groups (Mann–Whitney U-test,  $P = 0.669$ ) and fulfilled the purity criterion for down-stream measurements. RNA integrity was not determined since our previous studies proved that miRNA stability is not decreased in total RNA samples with low RNA integrity [3].

**Table S2.** MIQE checklist according to Bustin et al. [1].

| Item to Check                                                  | Importance | Checklist      | Where?; Comment                                                                                                                                                                       |
|----------------------------------------------------------------|------------|----------------|---------------------------------------------------------------------------------------------------------------------------------------------------------------------------------------|
| <b>Experimental Design</b>                                     |            |                |                                                                                                                                                                                       |
| Definition of experimental and control groups                  | E          | Yes            | Main text: Materials and Methods; Table I; Figure 1: Flow diagram                                                                                                                     |
| Number within each group                                       | E          | Yes            | Main text: Materials and Methods; Table I; Figure 1: Flow diagram                                                                                                                     |
| Assay carried out by core lab or investigator's lab?           | D          | Yes            | Investigator's lab                                                                                                                                                                    |
| Acknowledgement of authors' contributions                      | D          | No             |                                                                                                                                                                                       |
| <b>SAMPLE</b>                                                  |            |                |                                                                                                                                                                                       |
| Description                                                    | E          | Yes            | Main text: Materials and Methods, Patients and samples; RNA extraction...; Results: Study design, patients and sample characteristics; Supplementary Information S2, General comments |
| Volume/mass of sample processed                                | D          | Yes            | Main text: Materials and Methods, Patients and samples; RNA extraction...; Results: Study design, patients and sample characteristics; Supplementary Information S2, General comments |
| Microdissection or macrodissection                             | E          | Yes            | Main text: Materials and Methods, Patients and samples; RNA extraction...; Results: Study design, patients and sample characteristics; Supplementary Information S2, General comments |
| Processing procedure                                           | E          | Yes            | Main text: Materials and Methods, Patients and samples                                                                                                                                |
| If frozen - how and how quickly?                               | E          | Not applicable | FFPE material; see below                                                                                                                                                              |
| If fixed - with what, how quickly?                             | E          | Yes            | Tissue fixation immediately after nephrectomy in neutral-buffered formaldehyde solution for tissue fixation                                                                           |
| Sample storage conditions and duration (esp. for FFPE samples) | E          | Yes            | Main text: Materials and Methods: Patients and samples                                                                                                                                |
| <b>Nucleic Acid Extraction</b>                                 |            |                |                                                                                                                                                                                       |
| Procedure and/or instrumentation                               | E          | Yes            | Main text: Materials and Methods, RNA extraction                                                                                                                                      |
| Name of kit and details of any modifications                   | E          | Yes            | Main text: Materials and Methods, RNA extraction: miRNeasy FFPE Kit (Qiagen, Cat. No. 217504)                                                                                         |
| Source of additional reagents used                             | D          | No             |                                                                                                                                                                                       |

|                                                                                  |   |                |                                                                                                                                                                                                                                                                                                                                              |
|----------------------------------------------------------------------------------|---|----------------|----------------------------------------------------------------------------------------------------------------------------------------------------------------------------------------------------------------------------------------------------------------------------------------------------------------------------------------------|
| Details of DNase or RNase treatment                                              | E | Yes            | Main text: Materials and Methods, RNA extraction: on-column DNase digestion                                                                                                                                                                                                                                                                  |
| Contamination assessment (DNA or RNA)                                            | E | Yes            | Main text: Materials and Methods, RNA extraction: on-column DNase digestion; Supplementary Information S2: General comments: DNA contamination was excluded by reaction without reverse transcription in pilot experiments; in addition, this principle of miRNAs is not affected by genomic DNA contamination according to the manufacturer |
| Nucleic acid quantification                                                      | E | Yes            | Main text: Materials and Methods; RNA extraction: NanoDrop ND-1000; spectrophotometry                                                                                                                                                                                                                                                        |
| Instrument and method                                                            | E | Yes            | Main text: Materials and Methods; RNA extraction: NanoDrop ND-1000; spectrophotometry                                                                                                                                                                                                                                                        |
| Purity (A260/A280)                                                               | D | Yes            | Main text: Results, Study design and characteristics of patients and samples; Supplementary Information S2, General comments                                                                                                                                                                                                                 |
| Yield                                                                            | D | Yes            | Main text: Results, Study design and characteristics of patients and samples; Supplementary Information S2, General comments                                                                                                                                                                                                                 |
| RNA integrity method/instrument                                                  | E | Yes            | Main text: Results, Study design and characteristics of patients and samples; Supplementary Information S2: General comments                                                                                                                                                                                                                 |
| RIN/RQI or Cq of 3' and 5' transcripts                                           | E | Yes            | Supplementary Information S2: General comments                                                                                                                                                                                                                                                                                               |
| Electrophoresis traces                                                           | D | No             |                                                                                                                                                                                                                                                                                                                                              |
| Inhibition testing (Cq dilutions, spike or other)                                | E | Yes            | Supplementary Information S2 with Supplementary Figure. S1 with standard curves and their characteristics                                                                                                                                                                                                                                    |
| Storage conditions (Nucleic acid): temperature, concentration, duration, buffer) | E | Yes            | Main text: RNA extraction...: storage in nuclease-free water in two aliquots after isolation at −80 °C up to cDNA synthesis                                                                                                                                                                                                                  |
| <b>Reverse Transcription</b>                                                     |   |                |                                                                                                                                                                                                                                                                                                                                              |
| Complete reaction conditions                                                     | E | Yes            | Supplementary Information S2: cDNA synthesis and RT-PCR methodology                                                                                                                                                                                                                                                                          |
| Amount of RNA and reaction volume                                                | E | Yes            | Supplementary Information S2: cDNA synthesis                                                                                                                                                                                                                                                                                                 |
| Priming oligonucleotide (if using GSP) and concentration                         | E | Yes            | Supplementary Information S2: cDNA synthesis, Supplementary Table S4                                                                                                                                                                                                                                                                         |
| Reverse transcriptase and concentration                                          | E | Yes            | Supplementary Information S2: cDNA synthesis                                                                                                                                                                                                                                                                                                 |
| Temperature and time                                                             | E | Yes            | Supplementary Information S2: cDNA synthesis a                                                                                                                                                                                                                                                                                               |
| Manufacturer of reagents and catalogue numbers                                   | D | Yes            | Main text: Materials and Methods, ...miRNA quantification and Supplementary Information S2: cDNA synthesis                                                                                                                                                                                                                                   |
| Cqs with and without RT                                                          | D | Yes            | Supplementary Information S2: RT-PCR methodology, General comments; see also comment on DNase treatment concerning miRNAs                                                                                                                                                                                                                    |
| Storage conditions of cDNA                                                       | D | Yes            | Supplementary Information S2: cDNA synthesis; storage at −20 °C                                                                                                                                                                                                                                                                              |
| <b>qPCR Target Information</b>                                                   |   |                |                                                                                                                                                                                                                                                                                                                                              |
| Gene symbols                                                                     | E | Yes            | Main text: Materials and Methods, ...miRNA quantification and Supplementary Information S2: Supplementary Table S4                                                                                                                                                                                                                           |
| If multiplex, efficiency and LOD of each assay.                                  | E | Not applicable |                                                                                                                                                                                                                                                                                                                                              |
| Sequence accession number                                                        | E | Yes            | Main text: Materials and Methods, ...miRNA quantification and Supplementary Information S2: Supplementary Table S4                                                                                                                                                                                                                           |
| Location of amplicon                                                             | D | Yes            | Supplementary Information S2: Supplementary Table S4; controlled by the manufacturer of the miRNA assays (Thermo Fisher, Applied Biosystems)                                                                                                                                                                                                 |
| Amplicon length                                                                  | E | Yes            | Controlled by the manufacturer of the miRNA assays (Thermo Fisher, Applied Biosystems); own electrophoretic results showed 60–80 bp                                                                                                                                                                                                          |

|                                                           |   |                |                                                                                                                                                                                           |
|-----------------------------------------------------------|---|----------------|-------------------------------------------------------------------------------------------------------------------------------------------------------------------------------------------|
| In silico specificity screen (BLAST, etc.)                | E | Yes            | Controlled by the manufacturer of the miRNA assays (Thermo Fisher, Applied Biosystems)                                                                                                    |
| Pseudogenes, retropseudogenes or other homologs?          | D | Yes            | Controlled by the manufacturer of the miRNA assays (Thermo Fisher, Applied Biosystems)                                                                                                    |
| Sequence alignment                                        | D | Yes            | Controlled by the manufacturer of the miRNA assays (Thermo Fisher, Applied Biosystems)                                                                                                    |
| Secondary structure analysis of amplicon                  | D | Yes            | Controlled by the manufacturer of the miRNA assays (Thermo Fisher, Applied Biosystems)                                                                                                    |
| Location of each primer by exon or intron (if applicable) | E | Yes            | Controlled by the manufacturer of the miRNA assays (Thermo Fisher, Applied Biosystems)                                                                                                    |
| What splice variants are targeted?                        | E | Yes            | Controlled by the manufacturer of the miRNA assays (Thermo Fisher, Applied Biosystems)                                                                                                    |
| <b>qPCR Oligonucleotides</b>                              |   |                |                                                                                                                                                                                           |
| Primer sequences                                          | E | Yes            | Supplementary Information S2, quantitative real-time PCR: use of commercial kits (Thermo Fisher, Applied Biosystems); Supplementary Table S4                                              |
| RTPrimerDB Identification Number                          | D | No             |                                                                                                                                                                                           |
| Probe sequences                                           | D | Yes            | Supplementary Information S2, quantitative real-time PCR: use of commercial kits (Thermo Fisher, Applied Biosystems). Manufacturer does not provide this information                      |
| Location and identity of any modifications                | E | Yes            | Supplementary Information S2, quantitative real-time PCR: use of commercial kits (Thermo Fisher, Applied Biosystems), Supplementary Table S4                                              |
| Manufacturer of oligonucleotides                          | D | Yes            | Supplementary Information S2, quantitative real-time PCR: use of commercial kits (Thermo Fisher, Applied Biosystems). Manufacturer does not provide this information                      |
| Purification method                                       | D | Not applicable | Supplementary Information S2, quantitative real-time PCR: use of commercial kits (Thermo Fisher, Applied Biosystems). Manufacturer does not provide this information                      |
| <b>qPCR Protocol</b>                                      |   |                |                                                                                                                                                                                           |
| Complete reaction conditions                              | E | Yes            | Main text: Materials and Methods:.....miRNA quantification and Supplementary Information S2, using commercial tests, Supplementary Table S4 and quantitative real-time PCR                |
| Reaction volume and amount of cDNA/DNA                    | E | Yes            | Main text: Materials and Methods, ....miRNA quantification; Supplementary Information S2, quantitative real-time PCR                                                                      |
| Primer, (probe), Mg <sup>++</sup> and dNTP concentrations | E | Yes            | Main text: Materials and Methods, ....miRNA quantification; Supplementary Information S2, quantitative real-time PCR; details not provided by the manufacturer                            |
| Polymerase identity and concentration                     | E | Yes            | Main text: Materials and Methods, ....miRNA quantification; Supplementary Information S2 and Supplementary Table S4, quantitative real-time PCR; details not provided by the manufacturer |
| Buffer/kit identity and manufacturer                      | E | Yes            | Main text: Materials and Methods, ....miRNA quantification; Supplementary Information S2 and Supplementary Table S4, quantitative real-time PCR; details not provided by the manufacturer |
| Exact chemical constitution of the buffer                 | D | No             | Use of commercial tests, Supplementary Table S4; details are not provided by the manufacturer                                                                                             |
| Additives (SYBR Green I, DMSO, etc.)                      | E | Not applicable |                                                                                                                                                                                           |
| Manufacturer of plates/tubes and catalogue number         | D | Yes            | Main text: Materials and Methods, ..miRNA quantification; Supplementary Information S2: quantitative real-time PCR white 96-well plates (Roche)                                           |
| Complete thermocycling parameters                         | E | Yes            | Supplementary Information S2: quantitative real-time PCR                                                                                                                                  |
| Reaction setup (manual/robotic)                           | D | Yes            | Manual setup                                                                                                                                                                              |

|                                                          |   |                |                                                                                                                                                                                                                                                                  |
|----------------------------------------------------------|---|----------------|------------------------------------------------------------------------------------------------------------------------------------------------------------------------------------------------------------------------------------------------------------------|
| Manufacturer of qPCR instrument                          | E | Yes            | Main text: Materials and Methods, ...miRNA quantification; Supplementary Information S2: quantitative real-time PCR (LightCycler, Roche)                                                                                                                         |
| <b>qPCR Validation</b>                                   |   |                |                                                                                                                                                                                                                                                                  |
| Evidence of optimisation (from gradients)                | D | No             | Main text: Materials and Methods, ...miRNA quantification; Supplementary Information S2,: quantitative real-time PCR: Supplementary Table S4, use of commercial kits (Thermo Fisher, Applied Biosystems)                                                         |
| Specificity (gel, sequence, melt, or digest)             | E | Yes            | Controlled by the manufacturer of the miRNA assays (Thermo Fisher, Applied Biosystems)                                                                                                                                                                           |
| For SYBR Green I, Cq of the NTC                          | E | Not applicable |                                                                                                                                                                                                                                                                  |
| Standard curves with slope and y-intercept               | E | Yes            | Supplementary Information S2: Performance data of qPCR with Supplementary Figure S1 and legends                                                                                                                                                                  |
| PCR efficiency calculated from slope                     | E | Yes            | Supplementary Information S2: Performance data of qPCR with Supplementary Figure S1 and legends                                                                                                                                                                  |
| Confidence interval for PCR efficiency or standard error | D | Yes            | Supplementary Information S2: Performance data of qPCR with Supplementary Figure S1 and legends                                                                                                                                                                  |
| r2 of standard curve                                     | E | No             | Not provided by the LC480 software                                                                                                                                                                                                                               |
| Linear dynamic range                                     | E | Yes            | Supplementary Information S2: quantitative real-time PCR                                                                                                                                                                                                         |
| Cq variation at lower limit                              | E | Yes            | Supplementary Information S2: Performance data with Supplementary Table S5                                                                                                                                                                                       |
| Confidence intervals throughout range                    | D | No             |                                                                                                                                                                                                                                                                  |
| Evidence for limit of detection                          | E | No             | Dynamic range from 11 to 35 Cqs, but all measured miRNAs had Cqs <34                                                                                                                                                                                             |
| If multiplex, efficiency and LOD of each assay.          | E | Not applicable |                                                                                                                                                                                                                                                                  |
| <b>Data Analysis</b>                                     |   |                |                                                                                                                                                                                                                                                                  |
| qPCR analysis program (source, version)                  | E | Yes            | Main text: Materials and Methods, ...miRNA quantification; Supplementary Information S2: quantitative real-time PCR with LightCycler software, release 1.5.0 using the “second derivative maximum” method                                                        |
| Cq method determination                                  | E | Yes            |                                                                                                                                                                                                                                                                  |
| Outlier identification and disposition                   | E | Not applicable |                                                                                                                                                                                                                                                                  |
| Results of NTCs                                          | E | Yes            | Supplementary Information S2: General comments                                                                                                                                                                                                                   |
| Justification of number and choice of reference genes    | E | Yes            | Main text: Materials and Methods, ...miRNA quantification; in the pretesting approach using LightCycler, miR-103 was initially envisaged as normalizer, but the validation approach was continued using droplet digital PCR without the necessity of normalizers |
| Description of normalisation method                      | E | Not applicable | See previous comment                                                                                                                                                                                                                                             |
| Number and concordance of biological replicates          | D | Yes            | Example of concordance between matched samples measured on the array platform and LightCycler: Supplementary Figure S2                                                                                                                                           |
| Number and stage (RT or qPCR) of technical replicates    | E | Yes            | Supplementary Information S2: ...miRNA quantification using triplicates. Example of concordance between matched samples measured on the array platform and LightCycler: Supplementary Figure S2                                                                  |
| Repeatability (intra-assay variation)                    | E | Yes            | See reproducibility data as preferred performance criterion                                                                                                                                                                                                      |
| Reproducibility (inter-assay variation, %CV)             | D | Yes            | Supplementary Information S2: Performance data, see Supplementary Table S5                                                                                                                                                                                       |
| Power analysis                                           | D | Yes            | Main text: Results: Study design, patients and sample characteristics                                                                                                                                                                                            |
| Statistical methods for result significance              | E | Yes            | Main text: Materials and Methods, Data analysis and statistics                                                                                                                                                                                                   |
| Software (source, version)                               | E | Yes            | Main text: Materials and Methods: Data analysis and statistics                                                                                                                                                                                                   |
| Cq or raw data submission using RDML                     | D | No             |                                                                                                                                                                                                                                                                  |

**Table S3.** Digital MIQE checklist according to Huggett et al. [2].

| Item to Check                                                         | Importance | Checklist      | Where?; Comment                                                                                                                                                                                                                                                                                                                              |
|-----------------------------------------------------------------------|------------|----------------|----------------------------------------------------------------------------------------------------------------------------------------------------------------------------------------------------------------------------------------------------------------------------------------------------------------------------------------------|
| <b>Experimental Design</b>                                            |            |                |                                                                                                                                                                                                                                                                                                                                              |
| Definition of experimental and control groups                         | E          | Yes            | Main text: Materials and Methods; Table I; Figure 1: Flow diagram                                                                                                                                                                                                                                                                            |
| Number within each group                                              | E          | Yes            | Main text: Materials and Methods; Table I; Figure 1: Flow diagram                                                                                                                                                                                                                                                                            |
| Assay carried out by core lab or investigator's lab?                  | D          | Yes            | Investigator's lab                                                                                                                                                                                                                                                                                                                           |
| Power analysis                                                        | D          | Yes            | Main text: Results: Study design, patients and sample characteristics                                                                                                                                                                                                                                                                        |
| <b>Sample</b>                                                         |            |                |                                                                                                                                                                                                                                                                                                                                              |
| Description                                                           | E          | Yes            | Main text: Materials and Methods, Patients and samples; RNA extraction...; Results: Study design, patients and sample characteristics; Supplementary Information S2, General comments                                                                                                                                                        |
| Volume/mass of sample processed                                       | D          | Yes            | Main text: Materials and Methods, Patients and samples; RNA extraction...; Results: Study design, patients and sample characteristics; Supplementary Information S2, General comments                                                                                                                                                        |
| Microdissection or macrodissection                                    | E          | Yes            | Main text: Materials and Methods, Patients and samples; RNA extraction...; Results: Study design, patients and sample characteristics; Supplementary Information S2, General comments                                                                                                                                                        |
| Processing procedure                                                  | E          | Yes            | Main text: Materials and Methods, Patients and samples                                                                                                                                                                                                                                                                                       |
| If frozen - how and how quickly?                                      | E          | Not applicable | FFPE material; see below                                                                                                                                                                                                                                                                                                                     |
| If fixed - with what, how quickly?                                    | E          | Yes            | Tissue fixation immediately after nephrectomy in neutral-buffered formaldehyde solution for tissue fixation                                                                                                                                                                                                                                  |
| Sample storage conditions and duration (especially for FFPE samples)  | E          | Yes            | Main text: Materials and Methods: Patients and samples                                                                                                                                                                                                                                                                                       |
| <b>Nucleic Acid Extraction</b>                                        |            |                |                                                                                                                                                                                                                                                                                                                                              |
| Manufacturer of reagents used and catalogue number                    | D          | Yes            | Main text: Materials and Methods, RNA extraction: miRNeasy FFPE Kit (Qiagen, Cat. No. 217504)                                                                                                                                                                                                                                                |
| Quantification -instrument/method                                     | E          | Yes            | Main text: Materials and Methods; RNA extraction: NanoDrop ND-1000; spectrophotometry                                                                                                                                                                                                                                                        |
| DNA or RNA quantification                                             | E          | Yes            | RNA                                                                                                                                                                                                                                                                                                                                          |
| Quality/Integrity, method/instrument, e.g. RNA integrity              | E          | Yes            | Supplementary Information S2: General comments: A260/A280 ratio; Main text, Results: Study design, patients and sample characteristics                                                                                                                                                                                                       |
| Template structural information                                       | E          | Yes            | See above; RNA extraction using miRNeasy FFPE Kit Qiagen                                                                                                                                                                                                                                                                                     |
| Template modification (digestion, sonication, preamplification, etc.) | E          | Yes            | Main text: Materials and Methods, RNA extraction. : deparaffinization, tissue lysis (TissueLyser, Qiagen), proteinase K digestion                                                                                                                                                                                                            |
| Template treatment                                                    | E          | Yes            | Main text: Materials and Methods, RNA extraction. :deparaffinization, tissue lysis (TissueLyser, Qiagen), proteinase K digestion                                                                                                                                                                                                             |
| Inhibition dilutions or spike                                         | E          | Yes            | See Supplementary Table S2 and standard curves in Supplementary Figure S1; cDNA was diluted according to dilution schemes indicated in Supplementary Table S6                                                                                                                                                                                |
| DNA contamination assessment of RNA samples                           | E          | Yes            | Main text: Materials and Methods, RNA extraction: on-column DNase digestion; Supplementary Information S2: General comments: DNA contamination was excluded by reaction without reverse transcription in pilot experiments; in addition, this principle of miRNAs is not affected by genomic DNA contamination according to the manufacturer |

|                                                                                  |   |                |                                                                                                                                                                     |
|----------------------------------------------------------------------------------|---|----------------|---------------------------------------------------------------------------------------------------------------------------------------------------------------------|
| Details of DNase treatment where performed                                       | E | Yes            | See previous comment: on-column DNase treatment                                                                                                                     |
| Storage conditions (Nucleic acid): temperature, concentration, duration, buffer) | E | Yes            | Main text: RNA extraction...: storage in nucleases-free water in two aliquots after isolation at −80 °C up to cDNA synthesis                                        |
| <b>Reverse Transcription (if necessary)</b>                                      |   |                |                                                                                                                                                                     |
| cDNA priming method and concentration                                            | E | Yes            | Main text: Materials and Methods, ...miRNA quantification; Supplementary Information S2, cDNA synthesis-specific stem-loop RT primer, see Supplementary Table S4    |
| One- or two-step protocol                                                        | E | Yes            | Main text: Materials and Methods, two-step protocol                                                                                                                 |
| Amount of RNA used per reaction                                                  | E | Yes            | Supplementary Information S2: cDNA synthesis                                                                                                                        |
| Detailed reaction components and conditions                                      | E | Yes            | Supplementary Information S2: cDNA synthesis                                                                                                                        |
| RT efficiency                                                                    | D | No             |                                                                                                                                                                     |
| Estimated copies measured with and without addition of RT                        | D | Yes            | Supplementary Information S2, General comments                                                                                                                      |
| Manufacturer of reagents and catalogue numbers                                   | D | Yes            | Main text: Materials and Methods, ...miRNA quantification and Supplementary Information S2: cDNA synthesis                                                          |
| Reaction volume                                                                  | D |                | Supplementary Information S2: cDNA synthesis                                                                                                                        |
| Storage conditions of cDNA                                                       | D |                | Supplementary Information S2: cDNA synthesis; storage at −20 °C                                                                                                     |
| <b>dPCR Target Information</b>                                                   |   |                |                                                                                                                                                                     |
| Sequence accession number                                                        | E | Yes            | Main text: Materials and Methods, ...miRNA quantification and Supplementary Information S2: Supplementary Table S4                                                  |
| Location of amplicon                                                             | D | Yes            | Supplementary Information S2: Supplementary Table S4; controlled by the manufacturer of the miRNA assays (Thermo Fisher, Applied Biosystems)                        |
| Amplicon length                                                                  | E | Yes            | Controlled by the manufacturer of the miRNA assays (Thermo Fisher, Applied Biosystems); own electrophoretic results showed 60-80 bp                                 |
| In silico specificity screen (BLAST, etc)                                        | E | Yes            | Controlled by the manufacturer of the miRNA assays (Thermo Fisher, Applied Biosystems)                                                                              |
| Pseudogenes, retropseudogenes or other homologs?                                 | D | Yes            | Controlled by the manufacturer of the miRNA assays (Thermo Fisher, Applied Biosystems)                                                                              |
| Sequence alignment                                                               | D | Yes            | Controlled by the manufacturer of the miRNA assays (Thermo Fisher, Applied Biosystems)                                                                              |
| Secondary structure analysis of amplicon and GC content                          | D | Yes            | Controlled by the manufacturer of the miRNA assays (Thermo Fisher, Applied Biosystems)                                                                              |
| Location of each primer by exon or intron (if applicable)                        | E | Yes            | Controlled by the manufacturer of the miRNA assays (Thermo Fisher, Applied Biosystems)                                                                              |
| What splice variants are targeted?                                               | E | Yes            | Controlled by the manufacturer of the miRNA assays (Thermo Fisher, Applied Biosystems)                                                                              |
| <b>dPCR Oligonucleotides</b>                                                     |   |                |                                                                                                                                                                     |
| Primer sequences                                                                 | E | Yes            | Supplementary Information S2, Supplementary Table S4: use of commercial kits (Thermo Fisher, Applied Biosystems)                                                    |
| RTPrimerDB Identification Number                                                 | D | No             |                                                                                                                                                                     |
| Probe sequences                                                                  | D | Yes            | Main text: Materials and Methods...miRNA quantification: use of commercial kits (Thermo Fisher, Applied Biosystems). Manufacturer does not provide this information |
| Location and identity of any modifications                                       | E | Yes            | Main text: Materials and Methods...miRNA quantification: use of commercial kits (Thermo Fisher, Applied Biosystems), Supplementary Table S4                         |
| Manufacturer of oligonucleotides                                                 | D | Yes            | Main text: Materials and Methods...miRNA quantification: use of commercial kits (Thermo Fisher, Applied Biosystems). Manufacturer does not provide this information |
| Purification method                                                              | D | Not applicable | Main text: Materials and Methods...miRNA quantification: use of commercial kits (Thermo                                                                             |

|                                                                       |   |                |                                                                                                                                                                                                   |
|-----------------------------------------------------------------------|---|----------------|---------------------------------------------------------------------------------------------------------------------------------------------------------------------------------------------------|
|                                                                       |   |                | Fisher, Applied Biosystems). Manufacturer does not provide this information                                                                                                                       |
| <b>dPCR Protocol</b>                                                  |   |                |                                                                                                                                                                                                   |
| Complete reaction conditions                                          | E | Yesq           | Main text: Materials and Methods, miRNA quantification; Supplementary Information S2, Supplementary Table S6                                                                                      |
| Reaction volume and amount of cDNA/DNA                                | E | Yes            | Main text: Materials and Methods, miRNA quantification; Supplementary Information S2, Supplementary Table S6                                                                                      |
| Primer, (probe), Mg++ and dNTP concentrations                         | E | Yes            | Main text: Materials and Methods, miRNA quantification; Supplementary Information S2, Supplementary Tables S4 and 6; not all details are provided by the manufacturer                             |
| Polymerase identity and concentration                                 | E | Yes            | Main text: Materials and Methods, miRNA quantification; Supplementary Information S2, Supplementary Tables S4 and 6; not all details are provided by the manufacturer                             |
| Buffer/kit identity and manufacturer                                  | E | Yes            | Main text: Materials and Methods, miRNA quantification; Supplementary Information S2, Supplementary Tables S4 and 6                                                                               |
| Exact chemical constitution of the buffer                             | D | No             | Main text: Materials and Methods, miRNA quantification; Supplementary Information S2, Supplementary Tables S4 and 6, but not all details are provided by the manufacturer                         |
| Additives (SYBR Green I, DMSO, etc.)                                  | E | Not applicable |                                                                                                                                                                                                   |
| Plates/tubes catalogue number and manufacturer                        | D | Yes            | Main text: Materials and Methods, miRNA quantification; Supplementary Information S2, Supplementary Table S6                                                                                      |
| Complete thermocycling parameters                                     | E | Yes            | Main text: Materials and Methods, miRNA quantification; Supplementary Information S2, Supplementary Table S6                                                                                      |
| Reaction setup (manual/robotic)                                       | D | Yes            | Manual setup                                                                                                                                                                                      |
| Gravimetric or volumetric dilutions (manual/robotic)                  | D | Yes            | Supplementary Information S2, Supplementary Table S6                                                                                                                                              |
| Total PCR volume prepared                                             | D | Yes            | Main text: Materials and Methods, miRNA quantification; Supplementary Information S2, Supplementary Table S6                                                                                      |
| Partition number                                                      | E | Yes            | Supplementary Information S2, Supplementary Tables S6–8, Supplementary Figure S3                                                                                                                  |
| Individual partition volume                                           | E | Yes            | Provided by the manufacturer: 1 nL                                                                                                                                                                |
| Total volume of the partitions measured (effective reaction size)     | E | Yes            | Supplementary Information S2, Supplementary Tables S6–8, Supplementary Figure S3                                                                                                                  |
| Partition volume variance/SD                                          | D | Yes            | Supplementary Information S2, Supplementary Tables S6–8, Supplementary Figure S3                                                                                                                  |
| Comprehensive details and appropriate use of controls                 | E | Yes            | Supplementary Information S2, Supplementary Table S8                                                                                                                                              |
| Manufacturer of dPCR instrument                                       | E | Yes            | Main text: Materials and Methods, miRNA quantification; Supplementary Table S6 (QX200 ddPCR System from BIO-RAD)                                                                                  |
| <b>dPCR Validation</b>                                                |   |                |                                                                                                                                                                                                   |
| Optimisation data for the assay                                       | D | Yes            | Only partly optimized by optimizing the annealing temperature using thermal gradients since the original tests provided reliable results as shown in control experiments (Supplementary Table S8) |
| Specificity (when measuring rare mutations, pathogen sequences, etc.) | E | Not applicable |                                                                                                                                                                                                   |
| Limit of detection of calibration control                             | D | Not applicable |                                                                                                                                                                                                   |
| If multiplexing, comparison with singleplex assays                    | E | Not applicable |                                                                                                                                                                                                   |
| <b>DATA Analysis</b>                                                  |   |                |                                                                                                                                                                                                   |
| Mean copies per partition ( $\lambda$ or equivalent)                  | E |                | Supplementary Information S2, Supplementary Table S7                                                                                                                                              |

|                                                                                |   |     |                                                                                                                                                                                                                                                                  |
|--------------------------------------------------------------------------------|---|-----|------------------------------------------------------------------------------------------------------------------------------------------------------------------------------------------------------------------------------------------------------------------|
| dPCR analysis program (source, version)                                        | E | Yes | Main text: Materials and Methods, miRNA quantification; Supplementary Information S2, Supplementary Table S6: QuantaSoft Software Vs. 1.7.4.0917 from BIO-RAD                                                                                                    |
| Outlier identification and disposition                                         | E | Yes | Supplementary Information S2, Supplementary Table S3: legend                                                                                                                                                                                                     |
| Results of NTCs                                                                | E | Yes | Supplementary Information S2, General comments                                                                                                                                                                                                                   |
| Examples of positive(s) and negative experimental results as supplemental data | E | No  |                                                                                                                                                                                                                                                                  |
| Where appropriate, justification of number and choice of reference genes       | E | No  | Main text: Materials and Methods, ...miRNA quantification; in the pretesting approach using LightCycler, miR-103 was initially envisaged as normalizer, but the validation approach was continued using droplet digital PCR without the necessity of normalizers |
| Where appropriate, description of normalization method                         | E | No  |                                                                                                                                                                                                                                                                  |
| Number and concordance of biological replicates                                | D | Yes | Example of concordance between matched samples measured on the array platform and on LightCycler in the pretesting step: Supplementary Figure S2. Independent biological replicates as shown in the study were preferred                                         |
| Number and stage (RT or qPCR) of technical replicates                          | E | Yes | Duplicate qPCR measurements, see Supplementary Table S8, Part A                                                                                                                                                                                                  |
| Repeatability (intra-assay variation)                                          | E | Yes | Supplementary Information S2, Supplementary Table S8, Part A                                                                                                                                                                                                     |
| Reproducibility (inter-assay/user/lab etc variation)                           | D | Yes | Supplementary Information S2, Supplementary Table S8, Part B                                                                                                                                                                                                     |
| Experimental variance or CI d                                                  | E | Yes | Supplementary Information S2, Supplementary Table S8                                                                                                                                                                                                             |
| Statistical methods for analysis                                               | E | Yes | Main text: Materials and Methods, Data analysis and statistics                                                                                                                                                                                                   |
| Data submission using RDML (Real-time PCR Data Markup Language)                | D | No  |                                                                                                                                                                                                                                                                  |

In the following sections, the quantification of the selected differentially expressed miRs and analytical performance data for all the measurements are compiled.

### Pre-testing step: RT-qPCR analyses with the LightCycler 480.

The 11 selected differentially expressed miRNAs using the card array technique were measured in the pretesting step using TaqMan microRNA Reverse-Transcription Kits (Supplementary Table S4) with details given in the following and based on our previous publications [3–6].

**Table S4.** TaqMan MicroRNA assays used for RT-qPCR and droplet digital PCR: nomenclature and sequences of the miRNAs. Assay names and assay IDs are taken from the nomenclature of the supplier Thermo Fisher. The miRBase accession no., miRBase ID, and the target sequences were taken from the miRBase database release 22 (Sanger Institute, Manchester, UK; <http://www.mirbase.org>).

| miRBase ID<br>Release Version<br>22 | miRBase<br>Accession<br>No. | AB Assay<br>Name | AB<br>Assay<br>ID | Sequence                | Chromosome<br>Location/<br>Coordinates on<br>Build GRCh38 |
|-------------------------------------|-----------------------------|------------------|-------------------|-------------------------|-----------------------------------------------------------|
| hsa-miR-9-5p                        | MIMAT0000441                | hsa-miR-9        | 000583            | UCUUUGGUUAUCUAGCUGUAUGA | Chr. 1: 156420341<br>- 156420429 [-]                      |
| hsa-miR-20b-5p                      | MIMAT0001413                | hsa-miR-20b      | 001014            | CAAAGUGCUCUAGUGCAGGUAG  | Chr.X: 134169809<br>- 134169877 [-]                       |
| hsa-miR-203a-3p                     | MIMAT0000264                | hsa-miR-203      | 000507            | GUGAAAUGUUUAGGACCACUAG  | Chr.14: 104117405<br>- 104117514 [+]                      |
| hsa-miR-204-5p                      | MIMAT0000265                | hsa-miR-204      | 000508            | UUCCCUUUGUCAUCCUAUGCCU  | Chr. 9: 70809975 -<br>70810084 [-]                        |

|                              |              |                |        |                         |                                   |
|------------------------------|--------------|----------------|--------|-------------------------|-----------------------------------|
| hsa-miR-223-3p               | MIMAT0000280 | hsa-miR-223    | 002295 | UGUCAGUUUGUCAAAUACCCCA  | Chr. X: 66018870 - 66018979 [+]   |
| hsa-miR-342-3p               | MIMAT0000753 | hsa-miR-342-3p | 002260 | UCUCACACAGAAAUCGCACCCGU | Chr.14: 100109655 - 100109753 [+] |
| hsa-miR-483-5p               | MIMAT0004761 | hsa-miR-483-5p | 002338 | AAGACGGGAGGAAAGAAGGGAG  | Chr.11: 2134134 - 2134209 [-]     |
| hsa-miR-489-3p               | MIMAT0002805 | hsa-miR-489    | 002358 | GUGACAUCACAUAUACGGCAGC  | Chr. 7: 93483936 - 93484019 [-]   |
| hsa-miR-500a-5p              | MIMAT0004773 | hsa-miR-500    | 002428 | UAAUCCUUGCUACCUGGGUGAGA | Chr. X: 50008431 - 50008514 [+]   |
| hsa-miR-885-5p               | MIMAT0004947 | hsa-miR-885-5p | 002296 | UCCAUAACACUACCCUGCCUCU  | Chr. 3: 10394489 - 10394562 [-]   |
| hsa-miR-1269a                | MIMAT0005923 | hsa-miR-1269   | 002789 | CUGGACUGAGCCGUGCUACUGG  | Chr.4: 66276824 - 66276928 [+]    |
| <sup>a</sup> hsa-miR-103a-3p | MIMAT0000101 | hsa-miR-103    | 000439 | AGCAGCAUUGUACAGGGCUAUGA | Chr. 5: 168560896 - 168560973 [-] |

<sup>a</sup>Hsa-miR-103a-3p was initially envisaged to be used as normalizer for the RT-qPCR analyses.

### cDNA synthesis.

Total RNA was transcribed in cDNA with the TaqMan MicroRNA Reverse-Transcription Kit (Thermo Fisher, Applied Biosystems, Cat. No. 4366596) and miRNA specific stem-loop RT primers (Thermo Fisher, Applied Biosystems, Part No: 4427975). A final reaction mix of 10 µL included: 0.1 µL of dNTPs (100 mM total), 0.67 µL of MultiScribe RT (50 U/µL MuLV-RT), 1 µL of 10x RT-Buffer, 0.13 µL of RNase inhibitor (20 U/µL), 1 µL of miR-specific 5x RT primer, 1 µL of RNA (6.67 ng), and 6.1 µL of nuclease-free water. The transcription and detection of gDNA was separately controlled by full reaction mix without MultiScribe reverse transcriptase addition for each individual miRNA. The transcription was performed on a thermal block cycler with heated lid (Biometra, Göttingen, Germany) using the following conditions: 30 min at 16 °C (annealing), 30 min at 42 °C (transcription), 5 min at 85 °C (enzyme inactivation), final cooling to 4 °C and storage of cDNA at −20 °C until analysis.

### Quantitative real-time PCR.

In the pretesting step, the individual TaqMan miRNA assays were performed on the LightCycler 480 Instrument (Roche Applied Science, Mannheim, Germany) in white 96-well plates (Roche, Cat. No. 04729692001) covered with instrument specific sealing foils. Each well contained 10 µL of following components: 5 µL of TaqMan 2x Universal PCR Master Mix No AmpErase UNG (Thermo Fisher, Applied Biosystems; PN 4324018), 3.5 µL of nuclease-free water, 0.5 µL of 20x miR-specific TaqMan MicroRNA Assay primer (Applied Biosystems, PN 4427975), and 1 µL of cDNA. The PCR run conditions were as follows: hot-start polymerase activation at 95 °C for 10 min, 45 amplification cycles with strand dissociation at 95 °C for 15 s, and annealing/elongation at 60 °C for 60 s with fluorescence acquisition, and a final cooling step at 40 °C for 60 s. The Cq values were extracted by the LightCycler 480 software v1.5 based on the "second derivative maximum" method and imported into a special data format in qBasePLUS Software v2.6 (Biogazelle, Zwijnaarde, Belgium) for statistical analysis. Three standard curves (miR-9-5p, miR-489-3p, and reference miR-103-3p) were generated with the LC480 software by 10-fold dilution steps over 7 logs of a 1:2 pre-diluted cDNA mixed with a 1:1000 pre-diluted amplicon. Because the efficiencies of all three standard curves ranged between 1.93 and 1.98, we recalculated a new standard curve with the input of all generated Cq values of measured three miRs. The overall standard curve had an efficiency of 1.95 (see the following section "Performance data of RT-qPCR analyses" with Figure S1). The linear dynamic range of the overall standard curve was between Cq 11.06 and Cq 35.24. All samples were in this measuring range. However, we defined a Cq value of 34.0 as lower limit for the quantification in the qBasePLUS software to achieve reliable expression data. The abovementioned qPCR efficiency value was used in qBasePLUS for the efficiency corrected calculation of the relative quantification.

Performance data of the RT-qPCR analyses

The performance data include the following figures and tables with the standard PCR curves (Supplementary Figure S1, reproducibility data (Supplementary Table S5), and correlation data between array data and RT-PCR results (Supplementary Figure 2).

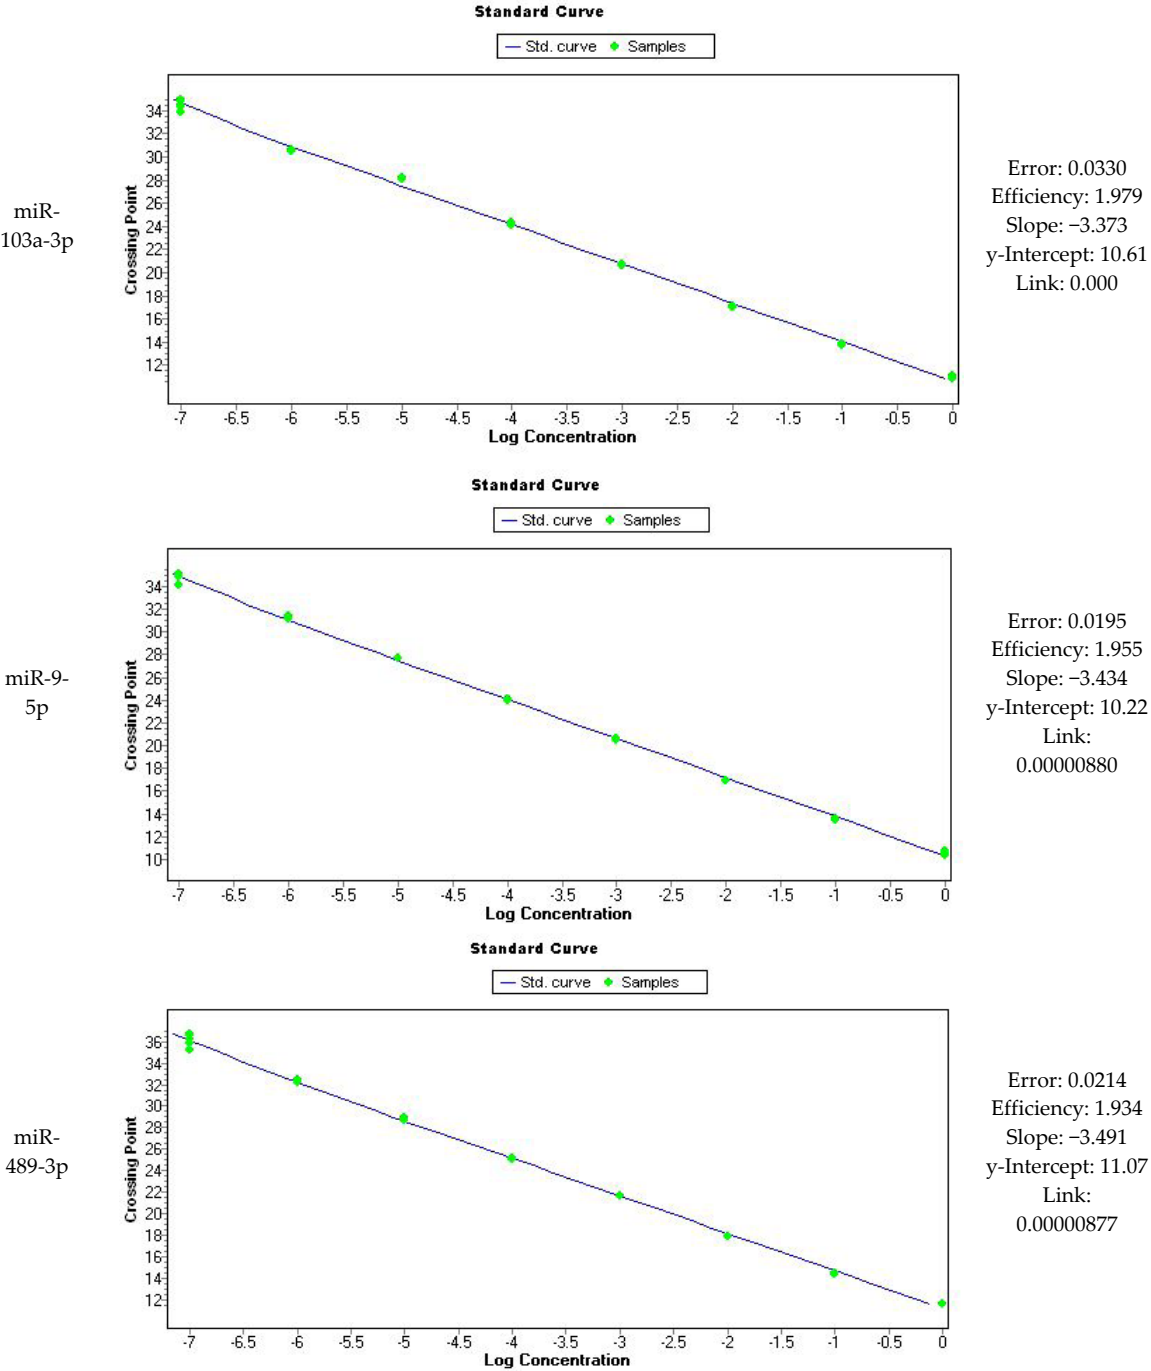

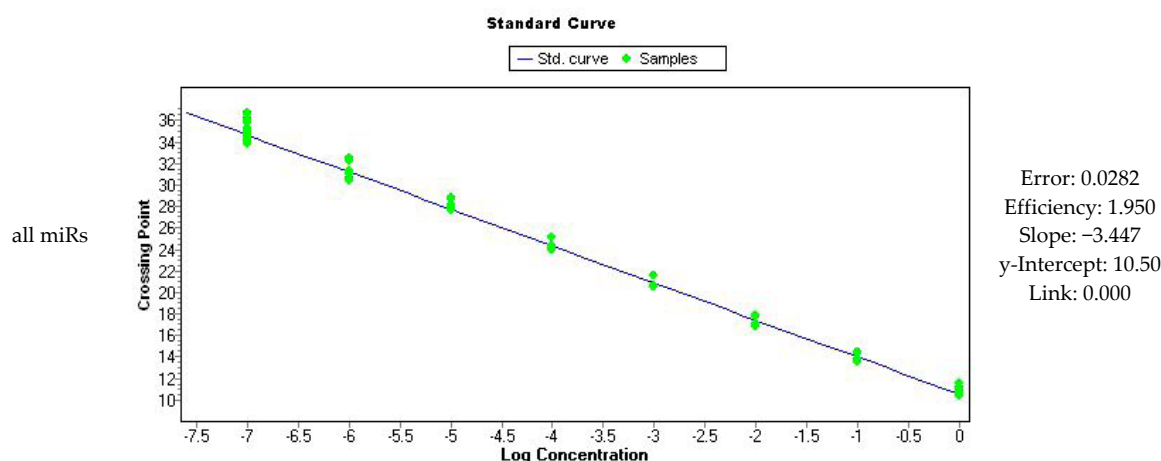

**Figure S1.** Characteristics of the standard curves of qPCR analyses. Standard curves were generated either from diluted cDNAs or from diluted amplicons. Cq values were calculated by the LightCycler Software Version 1.5.0 using the "second derivative maximum" method. The efficiency, the slope, intercept, and error of the regression line were calculated by the LightCycler 480 software. The PCR-efficiency is calculated by the LightCycler480 software after the formula:  $\text{Efficiency} = 10^{-1/\text{slope}}$ . According to the LightCycler 480 operator's manual, the error value is the mean squared error of the single data points fit to the regression line.

**Supplementary Table S5.** Reproducibility of miRNA measurements.

| Hsa-miR    | Concentrations |      | Replicates (n) |
|------------|----------------|------|----------------|
|            | Mean (SD)      | %RSD |                |
| miR-9-5p   |                |      |                |
| level 1    | 9.995 (0.417)  | 4.18 | 4              |
| level 2    | 0.049 (0.003)  | 7.07 | 5              |
| miR-489-3p |                |      |                |
| level 1    | 9.930 (0.377)  | 3.80 | 4              |
| level 2    | 0.091 (0.006)  | 6.52 | 5              |

Abbreviation: %RSD = percent relative standard deviation.

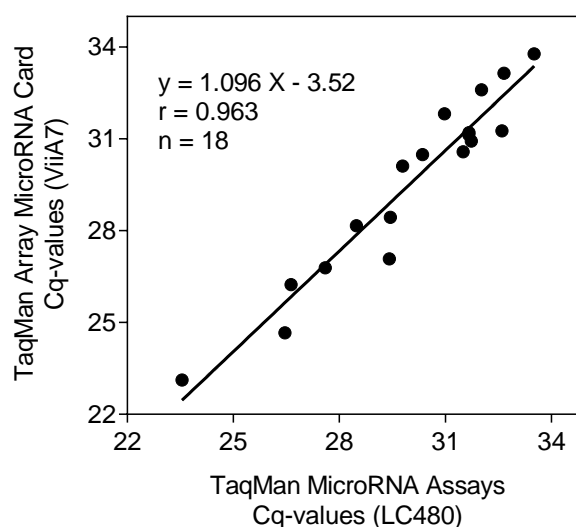

**Supplementary Figure S2.** Correlation between Array and RT-qPCR data of single miRNAs. The nine selected miRNAs examined in the validation phase showed strongly correlated Cq values in the two sample pools measured on the two platforms.

**Validation step: Droplet digital PCR with the QX200 digital PCR instrument**

Details of the cDNA synthesis are described above. In addition to the brief description given in the Materials and Methods of the main text, we summarized here further methodical details (Supplementary Table S6, Supplementary Figure 3, and Supplementary Table 7) and analytical performance data of the droplet digital PCR (Supplementary Table S8) as well as miRNA expression data (Supplementary Figure S4, Supplementary Table S9) in relation to clinicopathological factors in order to support the results presented in the main text.

### Methodical details of the droplet digital PCR

Methodical details are given in the following Supplementary Tables S6 and S7 and in Supplementary Figure S3.

**Table S6:** Measurement conditions of droplet digital PCR analyses.

| Instrument                                                                                                                                                                                                                                                      |                                                |                    |
|-----------------------------------------------------------------------------------------------------------------------------------------------------------------------------------------------------------------------------------------------------------------|------------------------------------------------|--------------------|
| QX200 ddPCR System (BIO-RAD, Germany, Munich) including following instruments (all from BIO-RAD):                                                                                                                                                               |                                                |                    |
| QX200 Droplet Generator                                                                                                                                                                                                                                         |                                                |                    |
| PX1 PCR Plate Sealer                                                                                                                                                                                                                                            |                                                |                    |
| T100 Thermal Cycler                                                                                                                                                                                                                                             |                                                |                    |
| QX200 Droplet Reader                                                                                                                                                                                                                                            |                                                |                    |
| Reagents                                                                                                                                                                                                                                                        |                                                |                    |
| 2x ddPCR Supermix for Probes (no dUTP, BIO-RAD Cat. No. #186-3024)                                                                                                                                                                                              |                                                |                    |
| miR-specific Primer/Probes (TaqMan microRNA assays, Thermo Fisher Scientific, Applied Biosystems; Supp. Table S4)                                                                                                                                               |                                                |                    |
| Experimental steps.                                                                                                                                                                                                                                             |                                                |                    |
| 1. Dispense 21 µL of ddPCR reaction mix (adjusted volume on pipet) up to the first hub of pipet (about 20 µL) without bubbles into the 8 sample-wells of the DG8 Cartridge (BIO-RAD Cat. No. #186-4008)                                                         |                                                |                    |
| 2. Add 70 µL of Droplet Generator Oil for Probes (BIO-RAD Cat. No. #186-3005) into the 8 oil-well of a DG8 Cartridge (BIO-RAD Cat. No. #186-4008)                                                                                                               |                                                |                    |
| 3. Cover cartridge with Droplet Generator DG8 Gasket (BIO-RAD Cat. No. #186-3009) and place the full cartridge into QX200 Droplet Generator (BIO-RAD)                                                                                                           |                                                |                    |
| 4. Remove the cartridge from the Droplet Generator, remove the gasket and transfer 40 µL of droplets with a 8-channel pipet (Pipet-Lite XLS, 5-50 µL LTS Rainin, Mettler-Toledo, Germany) into one column of a ddPCR 96-well plate (BIO-RAD, Cat. No #12001925) |                                                |                    |
| 5. Cover the 96-well plate with Pierceable Foil Heat Seal (BIO-RAD Cat. No. #181-4040) and insert the plate into heat block of the PX1 PCR plate sealer (BIO-RAD) and start the heat-sealing of 96-well plate with the foil for 5 s at 180°C                    |                                                |                    |
| 6. Transfer the 96-well plate into the T100 Thermal Cycler (BIO-RAD) and start PCR run                                                                                                                                                                          |                                                |                    |
| 7. After finishing PCR, transfer of 96-well plate into the QX200 Droplete Reader (BIO-RAD)                                                                                                                                                                      |                                                |                    |
| 8. Read out of droplets per well with ddPCR Droplet Reader Oil (BIO-RAD Cat. No. #186-3004) and calculate copies of target miR/µL ddPCR reaction mix using QuantaSoft Software Version 1.7.4. (BIO-RAD)                                                         |                                                |                    |
| Pipetting scheme for 1x Reaction mix/sample:                                                                                                                                                                                                                    |                                                |                    |
| Volume (µL)                                                                                                                                                                                                                                                     | Component                                      |                    |
| 11                                                                                                                                                                                                                                                              | 2x ddPCR Supermix for Probes                   |                    |
| 1.1                                                                                                                                                                                                                                                             | 20x miR-specific primer/probe                  |                    |
| 8.8                                                                                                                                                                                                                                                             | Nuclease free water                            |                    |
| 1.1                                                                                                                                                                                                                                                             | miR-specific cDNA (diluted or undiluted)       |                    |
| 22                                                                                                                                                                                                                                                              | total volume of ddPCR reaction mix             |                    |
| miR dependend volumes of cDNA were added                                                                                                                                                                                                                        |                                                |                    |
| Target miRNA                                                                                                                                                                                                                                                    | µL cDNA (predilution)/22 µL ddPCR Reaction Mix | ddPCR Cycle Number |
| hsa-miR-9-5p                                                                                                                                                                                                                                                    | 2.2                                            | 45                 |
| hsa-miR-103a-3p                                                                                                                                                                                                                                                 | 1                                              | 43                 |

|                                                               |           |    |
|---------------------------------------------------------------|-----------|----|
| hsa-miR-203a-3p                                               | 1.1       | 40 |
| hsa-miR-204-5p                                                | 1.1 (1:2) | 40 |
| hsa-miR-223-3p                                                | 1.1 (1:2) | 40 |
| hsa-miR-489-3p                                                | 2.2       | 45 |
| hsa-miR-500a-5p                                               | 1.1       | 45 |
| hsa-miR-885-5p                                                | 1.1       | 40 |
| (total volume cDNA + H <sub>2</sub> O = 9.9 µL per ddPCR mix) |           |    |

#### Thermal cycling steps for ddPCR run:

Instrument: T100 Thermal Cycler (Bio-Rad Laboratories GmbH, Germany, Munich); Ramp rate: 2 °C/s before and after annealing step (1 min); lid: 105 °C

| Step     | Time   | Temperature (°C) |
|----------|--------|------------------|
| HOLD     | 10 min | 95               |
| 39-44x { | 30 s   | 94               |
|          | 1 min  | 56               |
| HOLD     | 10 min | 98               |
| HOLD     | ∞      | 4                |

| Gene name<br>miRBase<br>v.22 | AB<br>assay<br>ID | Fluorescence amplitudes of positive and negative droplets/assay                      | Mean number<br>of accepted<br>droplets/well | %R<br>SD |
|------------------------------|-------------------|--------------------------------------------------------------------------------------|---------------------------------------------|----------|
| miR-9-5p                     | 000583            | 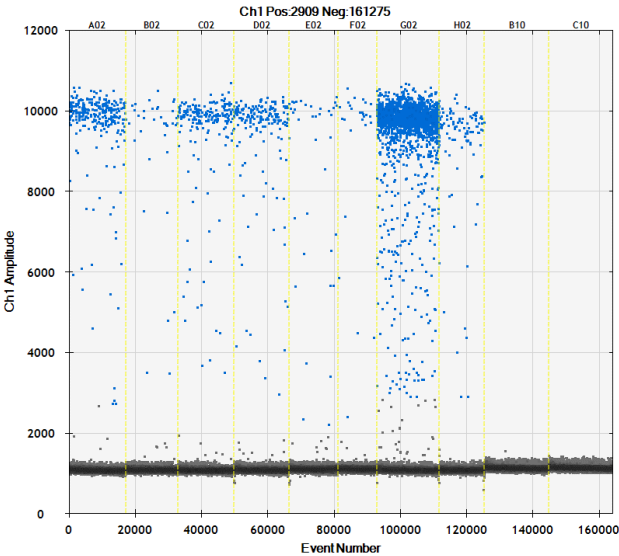   | 17352                                       | 9.6      |
| miR-103a-3p                  | 000439            | 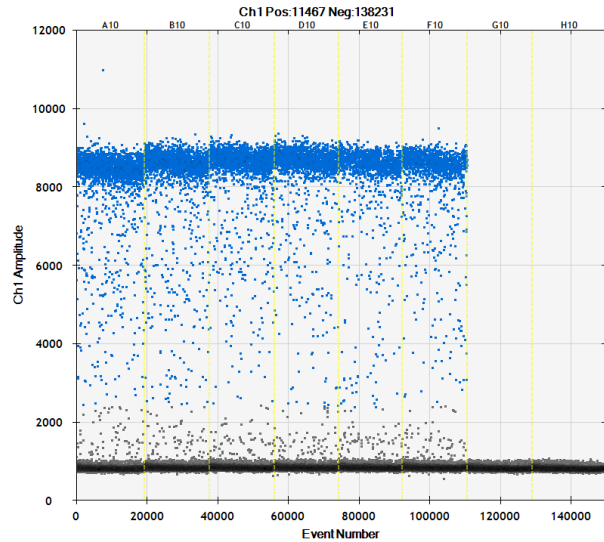  | 16713                                       | 10.0     |
| miR-203a-3p                  | 000507            | 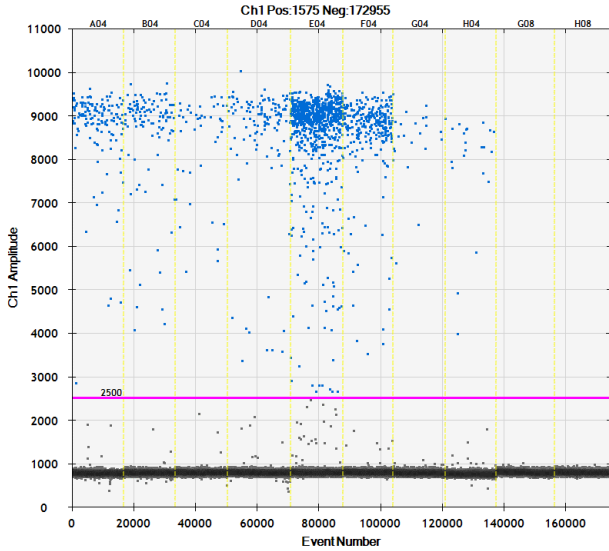 | 17434                                       | 7.5      |

| Gene name<br>miRBase<br>v.22 | AB<br>assay<br>ID | Fluorescence amplitudes of positive and negative droplets/assay                      | Mean number<br>of accepted<br>droplets/well | %R<br>SD |
|------------------------------|-------------------|--------------------------------------------------------------------------------------|---------------------------------------------|----------|
| miR-204-5p                   | 000508            | 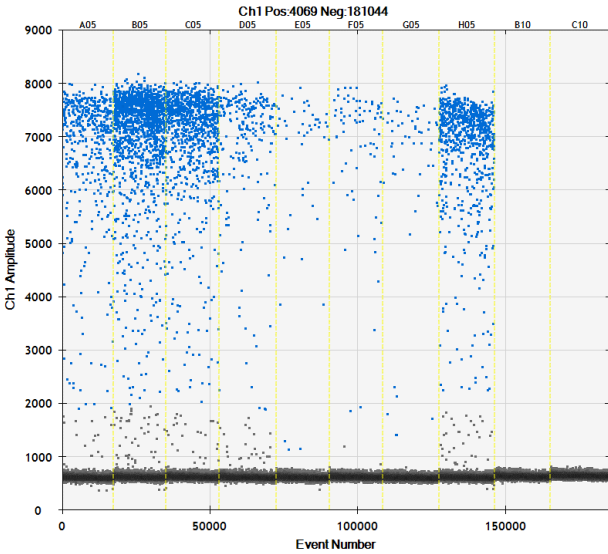   | 18000                                       | 7.5      |
| miR-223-3p                   | 002295            | 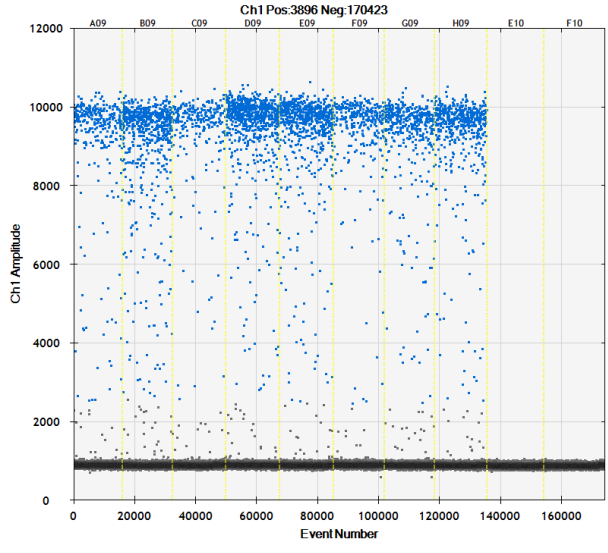  | 17314                                       | 9.3      |
| miR-489-3p                   | 002358            | 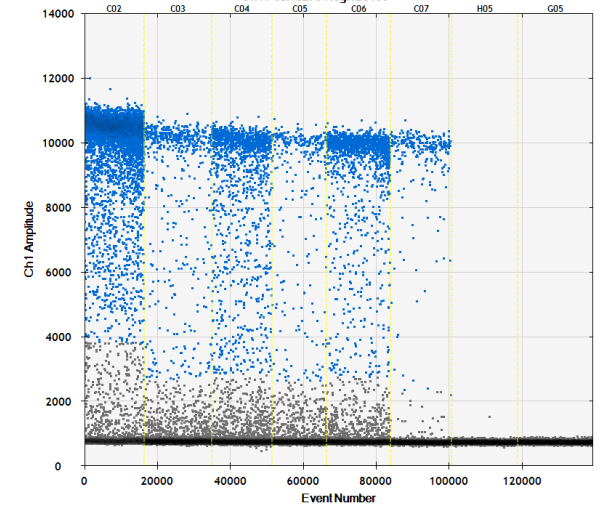 | 17736                                       | 7.3      |

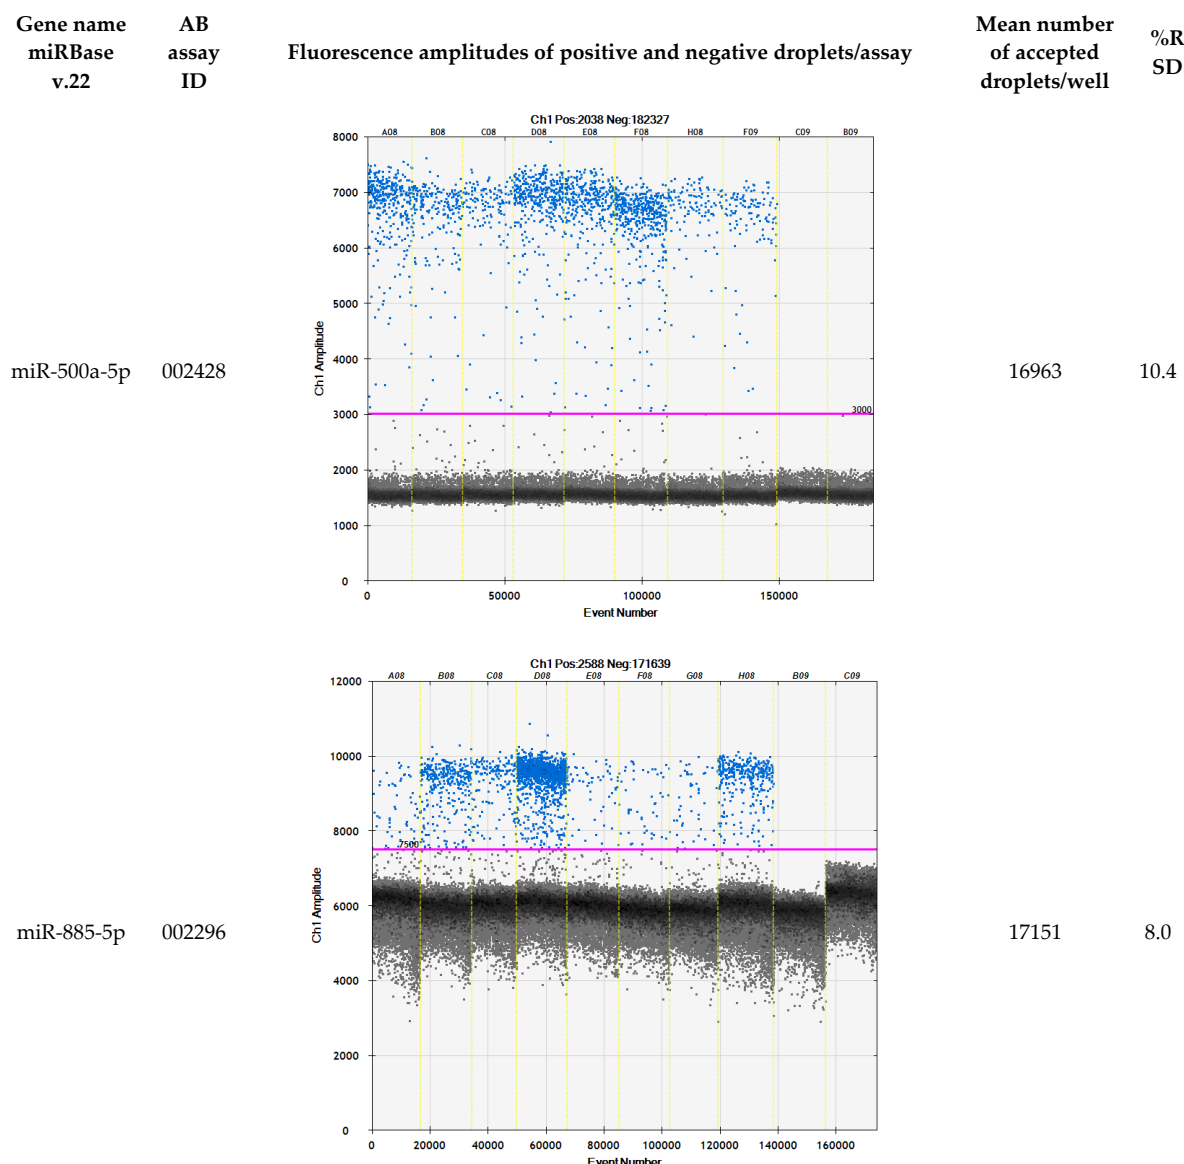

**Figure S3.** Fluorescence scatter plots of the droplet digital PCR miRNA assays. The blue clusters represent positive droplets with successful PCR amplification and the black clusters represent negative droplets without amplification. The threshold between positive and negative droplets can be set either automatically by the QuantaSoft software or manually (corresponding to the red line in the plot of miR-203a-3p, miR-500a-5p, and miR-885-5p). Outlier wells were indicated by the software with too many positive droplets, with quality score below 0.85 (corresponding with the drop volume of <0.85 nL) or wells with fewer than 10 000 droplets. The mean number of accepted droplets and %RSD was calculated using all measurements in this study. Abbreviation: %RSD = percent relative standard deviation.

**Table S7.** Parameter  $\lambda$  given as median copies and interquartile range per partition for the measured miRNAs.  $\lambda$  was calculated as ratio of the estimated copy number in the total volume in all partitions (m) to the number of partitions (n).

| $\lambda$<br>statistics<br>per miR | miR-9-<br>5p | miR-103-<br>3p | miR-203-<br>3p | miR-204-<br>5p | miR-223-<br>3p | miR-489-<br>3p | miR-500-<br>5p | miR-885-<br>5p |
|------------------------------------|--------------|----------------|----------------|----------------|----------------|----------------|----------------|----------------|
| Median                             | 0.0112       | 0.139          | 0.0055         | 0.0221         | 0.0284         | 0.0305         | 0.0153         | 0.0068         |

|             |                     |                     |                      |                     |                     |                     |                     |                     |
|-------------|---------------------|---------------------|----------------------|---------------------|---------------------|---------------------|---------------------|---------------------|
| <b>IQR*</b> | 0.0039 to<br>0.0371 | 0.0754 to<br>0.2020 | 0.00215 to<br>0.0140 | 0.0035 to<br>0.1063 | 0.0134 to<br>0.0546 | 0.0194 to<br>0.0775 | 0.0072 to<br>0.0291 | 0.0042 to<br>0.0209 |
|-------------|---------------------|---------------------|----------------------|---------------------|---------------------|---------------------|---------------------|---------------------|

\*IQR = interquartile range.

### Performance data of the droplet digital PCR analyses

Repeatability and reproducibility of measurements are presented as analytical performance data in the following Supplementary Table S8.

**Table S8.** Repeatability and reproducibility data of ddPCR analyses. Repeatability data (**A**) were calculated as percent RSD values based on duplicate measurements of miR-103a-3p in this study. Reproducibility data (**B**) were calculated both for the copies of all miRNAs and the accepted droplets in their analyses using different levels of control materials.

#### A. Repeatability data.

| <b>miR-103a-3p</b> | <b>Copy Number/μL</b> | <b>Accepted Droplets/Well</b> |
|--------------------|-----------------------|-------------------------------|
| Sample size        | 126                   | 126                           |
| Overall mean       | 132.8                 | 16662                         |
| SD                 | 6.57                  | 798                           |
| <b>%RSD</b>        | <b>4.95</b>           | <b>4.79</b>                   |

#### B. Reproducibility data.

| <b>Hsa-miR</b>     | <b>Copy Number/μL</b> |      | <b>Accepted Droplets/well</b> |      | <b>Replicates</b> |
|--------------------|-----------------------|------|-------------------------------|------|-------------------|
|                    | Mean (SD)             | %RSD | Mean (SD)                     | %RSD | (n)               |
| <b>miR-9-5p</b>    |                       |      |                               |      |                   |
| level 1            | 1.7 (0.19)            | 11.3 | 17271 (1545)                  | 8.9  | 4                 |
| level 2            | 15.2 (1.09)           | 7.2  | 18104 (896)                   | 4.9  | 5                 |
| level 3            | 145.2 (6.42)          | 4.4  | 17663 (2454)                  | 13.9 | 5                 |
| <b>miR-103a-3p</b> |                       |      |                               |      |                   |
| level 1            | 96.6 (6.39)           | 6.6  | 17573 (955)                   | 5.4  | 8                 |
| <b>miR-203a-3p</b> |                       |      |                               |      |                   |
| level 1            | 3.6 (0.44)            | 12.1 | 18786 (903)                   | 4.8  | 6                 |
| level 2            | 13.4 (1.23)           | 9.2  | 18106 (589)                   | 3.3  | 8                 |
| <b>miR-204-5p</b>  |                       |      |                               |      |                   |
| level 1            | 2.6 (0.40)            | 15.4 | 18002 (645)                   | 3.6  | 6                 |
| level 2            | 26.4 (2.61)           | 9.9  | 17396 (1346)                  | 7.7  | 6                 |
| <b>miR-223-3p</b>  |                       |      |                               |      |                   |
| level 1            | 22.5 (1.76)           | 7.8  | 17334 (308)                   | 1.8  | 4                 |
| level 2            | 35.4 (2.99)           | 8.4  | 17827 (1396)                  | 7.8  | 5                 |
| <b>miR-489-3p</b>  |                       |      |                               |      |                   |
| level 1            | 24.2 (1.15)           | 4.8  | 17386 (1328)                  | 7.6  | 5                 |
| level 2            | 106.0 (3.39)          | 3.2  | 17866 (294)                   | 1.6  | 5                 |
| <b>miR-500a-5p</b> |                       |      |                               |      |                   |
| level 1            | 7.2 (0.58)            | 8.0  | 17603 (1023)                  | 5.8  | 6                 |
| level 2            | 24.4 (1.40)           | 5.7  | 19083 (1035)                  | 5.4  | 5                 |
| <b>miR-885-5p</b>  |                       |      |                               |      |                   |
| level 1            | 3.4 (0.51)            | 15.0 | 16916 (1131)                  | 6.7  | 4                 |
| level 2            | 22.0 (2.10)           | 9.6  | 18437 (1057)                  | 5.7  | 5                 |

## Additional expression and correlation data

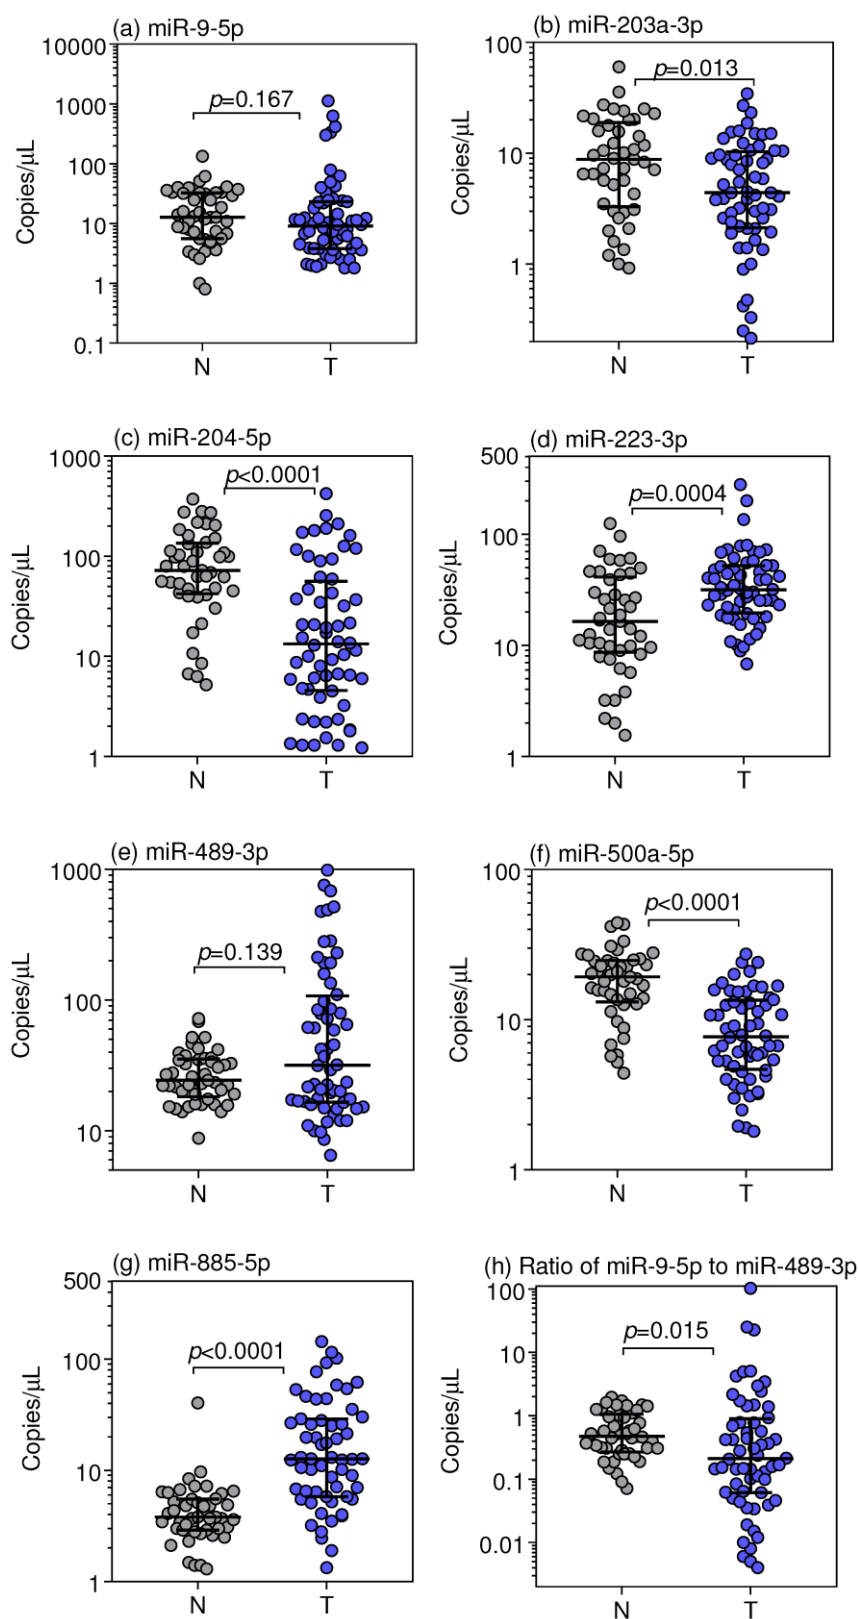

**Figure S4.** Expression of selected miRNAs in tumor samples of RCC patients compared to normal adjacent renal parenchyma. Values were measured using droplet digital RT-PCR and are represented as medians with interquartile ranges of 60 tumor samples (T) and 45 samples from normal renal parenchyma distant from tumor (N). Significant differences between the sample groups were calculated by Mann-Whitney  $U$  test.

**Table S9.** Spearman rank correlations between pathological variables and miRNAs. Data were calculated with the total cohort as the correlation coefficients did not differ ( $p < 0.100$ ) between the responder and non-responder patients.

| Correlation between pathological variables and miRNAs |                | miR-9-p      | miR-203a-3p | miR-204-5p    | miR-223-3p | miR-489-3p | miR-500a-5p | miR-885-5p |
|-------------------------------------------------------|----------------|--------------|-------------|---------------|------------|------------|-------------|------------|
| pT stage                                              | Spearman Rs    | 0.092        | -0.066      | -0.183        | 0.103      | 0.080      | -0.127      | -0.075     |
|                                                       | <i>p</i> value | 0.483        | 0.617       | 0.162         | 0.434      | 0.543      | 0.332       | 0.571      |
| Fuhrman grade                                         | Spearman Rs    | <b>0.324</b> | 0.008       | <b>-0.311</b> | -0.179     | -0.033     | -0.125      | -0.168     |
|                                                       | <i>p</i> value | <b>0.013</b> | 0.952       | <b>0.017</b>  | 0.178      | 0.808      | 0.348       | 0.207      |
| Metastatic status                                     | Spearman Rs    | 0.152        | -0.046      | 0.015         | 0.012      | -0.043     | -0.109      | -0.177     |
|                                                       | <i>p</i> value | 0.245        | 0.725       | 0.907         | 0.930      | 0.742      | 0.407       | 0.177      |

**Table S10.** List of the experimentally validated target genes of miR-9-5p taken from the databases miRTarBase [7], miRWalk2.0 [8], and Diana-Tarbase v.7.0 [9].

| Gene     | EntrezID  | Chr | Map           | Definition                                                       |
|----------|-----------|-----|---------------|------------------------------------------------------------------|
| ABCC1    | 4363      | 16  | 16p13.1       | ATP-binding cassette sub-family C CFTR/MRP member 1              |
| ACAA2    | 10449     | 18  | 18q21.1       | acetyl-CoA acyltransferase 2                                     |
| ACADSB   | 36        | 10  | 10q26.13      | acyl-CoA dehydrogenase short/branched chain                      |
| ACAT1    | 38        | 11  | 11q22.3       | acetyl-CoA acetyltransferase 1                                   |
| AGAP9    | 642517    | 10  | 10q11.22      | ArfGAP with GTPase domain ankyrin repeat and PH domain 9         |
| AKR1B10  | 57016     | 7   | 7q33          | aldo-keto reductase family 1 member B10 aldose reductase         |
| AKR1C8P  | 340811    | 10  | 10p15.1       | aldo-keto reductase family 1, member C8, pseudogene              |
| ALDH1A3  | 220       | 15  | 15q26.3       | aldehyde dehydrogenase 1 family member A3                        |
| AMOTL1   | 154810    | 11  | 11q14.3       | angiominin like 1                                                |
| ANKFY1   | 51479     | 17  | 17p13.3       | ankyrin repeat and FYVE domain containing 1                      |
| ANP32B   | 10541     | 9   | 9q22.32       | acidic leucine-rich nuclear phosphoprotein 32 family member B    |
| AP3B1    | 8546      | 5   | 5q14.1        | adaptor-related protein complex 3 beta 1 subunit                 |
| APBB2    | 323       | 4   | 4p13          | amyloid beta A4 precursor protein-binding family B member 2      |
| ARHGEF10 | 9639      | 8   | 8p23          | Rho guanine nucleotide exchange factor GEF 10                    |
| ARL8B    | 55207     | 3   | 3p26.1        | ADP-ribosylation factor-like 8B                                  |
| ATG10    | 83734     | 5   | 5q14.1        | autophagy related 10                                             |
| ATL1     | 51062     | 14  | 14q22.1       | atlastin GTPase 1                                                |
| ATP11C   | 286410    | X   | Xq27.1        | ATPase class VI type 11C                                         |
| ATP6V1C2 | 245973    | 2   | NA            | ATPase H <sup>+</sup> transporting lysosomal 42kDa V1 subunit C2 |
| ATP7A    | 538       | X   | Xq21.1        | ATPase Cu <sup>++</sup> transporting alpha polypeptide           |
| ATXN7    | 6314      | 3   | 3p21.1-p12    | ataxin 7                                                         |
| AUH      | 549       | 9   | 9q22.31       | AU RNA binding protein/enoyl-CoA hydratase                       |
| AVIL     | 10677     | 12  | 12q14.1       | advillin                                                         |
| BACE1    | 23621     | 11  | 11q23.2-q23.3 | beta-site APP-cleaving enzyme 1                                  |
| BCL2L11  | 10018     | 2   | 2q13          | BCL2-like 11 apoptosis facilitator                               |
| BCL6     | 604       | 3   | 3q27          | B-cell CLL/lymphoma 6                                            |
| BIK      | 638       | 22  | 22q13.31      | BCL2-interacting killer apoptosis-inducing                       |
| BOD1L1   | 259282    | 4   | 4p16.1        | bioorientation of chromosomes in cell division 1-like 1          |
| C7orf31  | 136895    | 7   | 7p15.3        | chromosome 7 open reading frame 31                               |
| CA13     | 377677    | 8   | 8q21.2        | carbonic anhydrase XIII                                          |
| CA8      | 767       | 8   | 8q12.1        | carbonic anhydrase VIII                                          |
| CALML5   | 51806     | 10  | 10p15.1       | calmodulin-like 5                                                |
| CAPZA1   | 829       | 1   | 1p13.2        | capping protein actin filament muscle Z-line alpha 1             |
| CARD19   | 84270     | 9   | 9q22.31       | caspase recruitment domain family member 19                      |
| CCDC152  | 100129792 | 5   | 5p12          | coiled-coil domain containing 152                                |
| CCL19    | 6363      | 9   | 9p13          | chemokine C-C motif ligand 19                                    |
| CCND1    | 595       | 11  | 11q13         | cyclin D1                                                        |
| CCNDBP1  | 23582     | 15  | 15q14-q15     | cyclin D-type binding-protein 1                                  |

| Gene    | EntrezID | Chr | Map          | Definition                                                            |
|---------|----------|-----|--------------|-----------------------------------------------------------------------|
| CCNG1   | 900      | 5   | 5q32-q34     | cyclin G1                                                             |
| CD34    | 947      | 1   | 1q32         | CD34 molecule                                                         |
| CD46    | 4179     | 1   | 1q32         | CD46 molecule complement regulatory protein                           |
| CDH1    | 999      | 16  | 16q22.1      | cadherin 1 type 1 E-cadherin epithelial                               |
| CDH3    | 1001     | 16  | 16q22.1      | cadherin 3 type 1 P-cadherin placental                                |
| CDH7    | 1005     | 18  | 18q22.1      | cadherin 7 type 2                                                     |
| CDK12   | 51755    | 17  | 17q12        | cyclin-dependent kinase 12                                            |
| CDX2    | 1045     | 13  | 13q12.3      | caudal type homeobox 2                                                |
| CERS2   | 29956    | 1   | 1q21.3       | ceramide synthase 2                                                   |
| CERS4   | 79603    | 19  | 19p13.2      | ceramide synthase 4                                                   |
| CHMP2B  | 25978    | 3   | 3p11.2       | charged multivesicular body protein 2B                                |
| CHMP3   | 51652    | 2   | 2p11.2       | charged multivesicular body protein 3                                 |
| CHSY1   | 22856    | 15  | 15q26.3      | chondroitin sulfate synthase 1                                        |
| CMKLR1  | 1240     | 12  | 12q24.1      | chemokine-like receptor 1                                             |
| CMTM2   | 146225   | 16  | 16q21        | CKLF-like MARVEL transmembrane domain containing 2                    |
| CNOT6   | 57472    | 5   | 5q35.3       | CCR4-NOT transcription complex subunit 6                              |
| COL12A1 | 1303     | 6   | 6q12-q13     | collagen type XII alpha 1                                             |
| COL6A5  | 256076   | 3   | 3q22.1       | collagen type VI alpha 5                                              |
| COLEC12 | 81035    | 18  | 18p11.32     | collectin sub-family member 12                                        |
| CPA4    | 51200    | 7   | 7q32         | carboxypeptidase A4                                                   |
| CPEB4   | 80315    | 5   | 5q21         | cytoplasmic polyadenylation element binding protein 4                 |
| CREB1   | 1385     | 2   | 2q34         | cAMP responsive element binding protein 1                             |
| CTHRC1  | 115908   | 8   | 8q22.3       | collagen triple helix repeat containing 1                             |
| CUEDC1  | 404093   | 17  | 17q23.2      | CUE domain containing 1                                               |
| CXCR4   | 7852     | 2   | 2q21         | chemokine C-X-C motif receptor 4                                      |
| CXXC5   | 51523    | 5   | 5q31.2       | CXXC finger protein 5                                                 |
| CYFIP2  | 26999    | 5   | 5q33.3       | cytoplasmic FMR1 interacting protein 2                                |
| CYP39A1 | 51302    | 6   | 6p21.1-p11.2 | cytochrome P450 family 39 subfamily A polypeptide 1                   |
| DICER1  | 23405    | 14  | 14q32.13     | dicer 1 ribonuclease type III                                         |
| DMXL1   | 1657     | 5   | 5q22         | Dmx-like 1                                                            |
| DRD2    | 1813     | 11  | 11q23        | dopamine receptor D2                                                  |
| DSP     | 1832     | 6   | 6p24         | desmoplakin                                                           |
| E2F7    | 144455   | 12  | 12q21.2      | E2F transcription factor 7                                            |
| EDEM3   | 80267    | 1   | 1q25         | ER degradation enhancer mannosidase alpha-like 3                      |
| EEF2K   | 29904    | 16  | 16p12.2      | eukaryotic elongation factor-2 kinase                                 |
| EFCAB14 | 9813     | 1   | 1p33         | EF-hand calcium binding domain 14                                     |
| EFNA1   | 1942     | 1   | 1q21-q22     | ephrin-A1                                                             |
| ELAVL1  | 1994     | 19  | 19p13.2      | ELAV like RNA binding protein 1                                       |
| ELF3    | 1999     | 1   | 1q32.2       | E74-like factor 3 ets domain transcription factor epithelial-specific |
| EMC1    | 23065    | 1   | 1p36.13      | ER membrane protein complex subunit 1                                 |
| EN2     | 2020     | 7   | 7q36         | engrailed homeobox 2                                                  |
| ENDOD1  | 23052    | 11  | 11q21        | endonuclease domain containing 1                                      |
| EOGT    | 285203   | 3   | 3p14.1       | EGF domain-specific O-linked N-acetylglucosamine GlcNAc transferase   |
| EP300   | 2033     | 22  | 22q13.2      | E1A binding protein p300                                              |
| ESR1    | 2099     | 6   | 6q25.1       | estrogen receptor 1                                                   |
| ETS1    | 2113     | 11  | 11q23.3      | v-ets avian erythroblastosis virus E26 oncogene homolog 1             |
| F2      | 2147     | 11  | 11p11        | coagulation factor II thrombin                                        |
| FAIM    | 55179    | 3   | 3q22.3       | Fas apoptotic inhibitory molecule                                     |
| FAM46A  | 55603    | 6   | 6q14         | family with sequence similarity 46 member A                           |
| FAM73B  | 84895    | 9   | 9q34.11      | family with sequence similarity 73 member B                           |
| FBN2    | 2201     | 5   | 5q23-q31     | fibrillin 2                                                           |
| FERMT1  | 55612    | 20  | 20p12.3      | fermitin family member 1                                              |

| Gene      | EntrezID | Chr | Map           | Definition                                                                            |
|-----------|----------|-----|---------------|---------------------------------------------------------------------------------------|
| FERMT2    | 10979    | 14  | 14q22.1       | fermitin family member 2                                                              |
| FLNB      | 2317     | 3   | 3p14.3        | filamin B beta                                                                        |
| FNBP1     | 23048    | 9   | 9q34          | formin binding protein 1                                                              |
| FOXO1     | 2308     | 13  | 13q14.1       | forkhead box O1                                                                       |
| FOXO3     | 2309     | 6   | 6q21          | forkhead box O3                                                                       |
| FOXP1     | 27086    | 3   | 3p14.1        | forkhead box P1                                                                       |
| FRMD4A    | 55691    | 10  | 10p13         | FERM domain containing 4A                                                             |
| FRMD4B    | 23150    | 3   | 3p14.1        | FERM domain containing 4B                                                             |
| FSTL3     | 10272    | 19  | 19p13         | folliculin-like 3 secreted glycoprotein                                               |
| GALNTL6   | 442117   | 4   | 4q34.1        | polypeptide N-acetylgalactosaminyltransferase-like 6                                  |
| GFOD1     | 54438    | 6   | 6pter-p22.1   | glucose-fructose oxidoreductase domain containing 1                                   |
| GIGYF1    | 64599    | 7   | 7q22          | GRB10 interacting GYF protein 1                                                       |
| GIP       | 2695     | 17  | 17q21.3-q22   | gastric inhibitory polypeptide                                                        |
| GNAT2     | 2780     | 1   | 1p13.1        | guanine nucleotide binding protein G protein alpha transducing activity polypeptide 2 |
| GPBP1L1   | 60313    | 1   | 1p34.1        | GC-rich promoter binding protein 1-like 1                                             |
| GRN       | 2896     | 17  | 17q21.32      | granulin                                                                              |
| HBP1      | 26959    | 7   | 7q22-q31      | HMG-box transcription factor 1                                                        |
| HDAC4     | 9759     | 2   | 2q37.3        | histone deacetylase 4                                                                 |
| HIST1H2AE | 3012     | 6   | 6p22.1        | histone cluster 1 H2ae                                                                |
| HIST1H2AI | 8329     | 6   | 6p22.1        | histone cluster 1 H2ai                                                                |
| HIST1H3F  | 8968     | 6   | 6p22.2        | histone cluster 1 H3f                                                                 |
| HIST1H4H  | 8365     | 6   | 6p22.1        | histone cluster 1 H4h                                                                 |
| HIST2H2AC | 8338     | 1   | 1q21.2        | histone cluster 2 H2ac                                                                |
| HLA-A     | 3105     | 6   | 6p21.3        | major histocompatibility complex class I A                                            |
| HN1L      | 90861    | 16  | 16p13.3       | hematological and neurological expressed 1-like                                       |
| HOXC12    | 3228     | 12  | 12q13.13      | homeobox C12                                                                          |
| HTR3A     | 3359     | 11  | 11q23.1       | 5-hydroxytryptamine serotonin receptor 3A ionotropic                                  |
| ID2       | 3398     | 2   | 2p25          | inhibitor of DNA binding 2 dominant negative helix-loop-helix protein                 |
| ID4       | 3400     | 6   | 6p22.3        | inhibitor of DNA binding 4 dominant negative helix-loop-helix protein                 |
| IDS       | 3423     | X   | Xq28          | iduronate 2-sulfatase                                                                 |
| IGF2R     | 3482     | 6   | 6q26          | insulin-like growth factor 2 receptor                                                 |
| IL5       | 3567     | 5   | 5q31.1        | interleukin 5                                                                         |
| IPO7      | 10527    | 11  | 11p15.4       | importin 7                                                                            |
| IPPK      | 64768    | 9   | 9q22.31       | inositol 13456-pentakisphosphate 2-kinase                                             |
| IREB2     | 3658     | 15  | 15q25.1       | iron-responsive element binding protein 2                                             |
| ITGB3BP   | 23421    | 1   | 1p31.3        | integrin beta 3 binding protein beta3-endonexin                                       |
| JAK1      | 3716     | 1   | 1p32.3-p31.3  | Janus kinase 1                                                                        |
| KCNJ15    | 3772     | 21  | 21q22.2       | potassium inwardly-rectifying channel subfamily J member 15                           |
| KCNJ2     | 3759     | 17  | 17q24.3       | potassium inwardly-rectifying channel subfamily J member 2                            |
| KIAA1468  | 57614    | 18  | 18q21.33      | KIAA1468                                                                              |
| KIF1A     | 547      | 2   | 2q37.3        | kinesin family member 1A                                                              |
| KIF1B     | 23095    | 1   | 1p36.2        | kinesin family member 1B                                                              |
| KIF1C     | 10749    | 17  | 17p13.2       | kinesin family member 1C                                                              |
| KLF17     | 128209   | 1   | 1p34.1        | Kruppel-like factor 17                                                                |
| KLF5      | 688      | 13  | 13q22.1       | Kruppel-like factor 5 intestinal                                                      |
| KLF6      | 1316     | 10  | 10p15         | Kruppel-like factor 6                                                                 |
| KLRC1     | 3821     | 12  | 12p13         | killer cell lectin-like receptor subfamily C member 1                                 |
| KLRK1     | 22914    | 12  | 12p13.2-p12.3 | killer cell lectin-like receptor subfamily K member 1                                 |
| KMT2D     | 8085     | 12  | 12q13.12      | lysine K-specific methyltransferase 2D                                                |
| LDLRAP1   | 26119    | 1   | 1p36-p35      | low density lipoprotein receptor adaptor protein 1                                    |
| LHFPL2    | 10184    | 5   | 5q14.1        | lipoma HMGIC fusion partner-like 2                                                    |
| LMNA      | 4000     | 1   | 1q22          | lamin A/C                                                                             |

| Gene    | EntrezID | Chr | Map           | Definition                                                                                                                          |
|---------|----------|-----|---------------|-------------------------------------------------------------------------------------------------------------------------------------|
| LPPR2   | 64748    | 19  | 19p13.2       | lipid phosphate phosphatase-related protein type 2                                                                                  |
| LPXN    | 9404     | 11  | 11q12.1       | leupaxin                                                                                                                            |
| LRP1    | 4035     | 12  | 12q13.3       | low density lipoprotein receptor-related protein 1                                                                                  |
| LRRC15  | 131578   | 3   | 3q29          | leucine rich repeat containing 15                                                                                                   |
| LRRTM1  | 347730   | 2   | 2p12          | leucine rich repeat transmembrane neuronal 1                                                                                        |
| MAGEA2B | 266740   | X   | Xq28          | melanoma antigen family A 2B                                                                                                        |
| MALAT1  | 378938   | 11  | 11q13.1       | metastasis associated lung adenocarcinoma transcript 1 (non-protein coding)                                                         |
| MAP1B   | 4131     | 5   | 5q13          | microtubule-associated protein 1B                                                                                                   |
| MAP3K3  | 4215     | 17  | 17q23.3       | mitogen-activated protein kinase kinase kinase 3                                                                                    |
| MAP3K8  | 1326     | 10  | 10p11.23      | mitogen-activated protein kinase kinase kinase 8                                                                                    |
| MCC     | 4163     | 5   | 5q21          | mutated in colorectal cancers                                                                                                       |
| MDM4    | 4194     | 1   | 1q32          | MDM4 p53 regulator                                                                                                                  |
| MESDC1  | 59274    | 15  | 15q13         | mesoderm development candidate 1                                                                                                    |
| MKX     | 283078   | 10  | 10p12.1       | mohawk homeobox                                                                                                                     |
| MMP13   | 4322     | 11  | 11q22.3       | matrix metalloproteinase 13 collagenase 3                                                                                           |
| MMP2    | 4313     | 16  | 16q13-q21     | matrix metalloproteinase 2 gelatinase A 72kDa gelatinase 72kDa type IV collagenase                                                  |
| MMP9    | 4318     | 20  | 20q11.2-q13.1 | matrix metalloproteinase 9 gelatinase B 92kDa gelatinase 92kDa type IV collagenase                                                  |
| MN1     | 4330     | 22  | 22q12.1       | meningioma disrupted in balanced translocation 1                                                                                    |
| MORF4L1 | 10933    | 15  | 15q24         | mortality factor 4 like 1                                                                                                           |
| MSR1    | 4481     | 8   | 8p22          | macrophage scavenger receptor 1                                                                                                     |
| MTHFD1  | 4522     | 14  | 14q24         | methylenetetrahydrofolate dehydrogenase NADP+ dependent 1 methenyltetrahydrofolate cyclohydrolase formyltetrahydrofolate synthetase |
| MTHFD2  | 10797    | 2   | 2p13.1        | methylenetetrahydrofolate dehydrogenase NADP+ dependent 2 methenyltetrahydrofolate cyclohydrolase                                   |
| MTL5    | 9633     | 11  | 11q13.2-q13.3 | metallothionein-like 5 testis-specific tesmin                                                                                       |
| MTX3    | 345778   | 5   | 5q14.1        | metaxin 3                                                                                                                           |
| MYF6    | 4618     | 12  | 12q21         | myogenic factor 6 herculin                                                                                                          |
| MYH9    | 4627     | 22  | 22q13.1       | myosin heavy chain 9 non-muscle                                                                                                     |
| MYLK    | 4638     | 3   | 3q21          | myosin light chain kinase                                                                                                           |
| NAV1    | 89796    | 1   | 1q32.3        | neuron navigator 1                                                                                                                  |
| NBEA    | 26960    | 13  | 13q13         | neurobeachin                                                                                                                        |
| NCOR2   | 9612     | 12  | 12q24         | nuclear receptor corepressor 2                                                                                                      |
| NF1     | 4763     | 17  | 17q11.2       | neurofibromin 1                                                                                                                     |
| NFAT5   | 10725    | 16  | 16q22.1       | nuclear factor of activated T-cells 5 tonicity-responsive                                                                           |
| NFATC3  | 4775     | 16  | 16q22.2       | nuclear factor of activated T-cells cytoplasmic calcineurin-dependent 3                                                             |
| NFKB1   | 4790     | 4   | 4q24          | nuclear factor of kappa light polypeptide gene enhancer in B-cells 1                                                                |
| NIN     | 51199    | 14  | 14q22.1       | ninein GSK3B interacting protein                                                                                                    |
| NIPA1   | 123606   | 15  | 15q11.2       | non imprinted in Prader-Willi/Angelman syndrome 1                                                                                   |
| NKX2-2  | 4821     | 20  | 20p11.22      | NK2 homeobox 2                                                                                                                      |
| NMNAT2  | 23057    | 1   | 1q25          | nicotinamide nucleotide adenylyltransferase 2                                                                                       |
| NPY4R   | 5540     | 10  | 10q11.2       | neuropeptide Y receptor Y4                                                                                                          |
| NR2E1   | 7101     | 6   | 6q21          | nuclear receptor subfamily 2 group E member 1                                                                                       |
| NR6A1   | 2649     | 9   | 9q33.3        | nuclear receptor subfamily 6 group A member 1                                                                                       |
| NRIP3   | 56675    | 11  | 11p15.3       | nuclear receptor interacting protein 3                                                                                              |
| NSUN7   | 79730    | 4   | 4p14          | NOP2/Sun domain family member 7                                                                                                     |
| NTRK3   | 4916     | 15  | 15q25         | neurotrophic tyrosine kinase receptor type 3                                                                                        |
| NUDT19  | 390916   | 19  | 19q13.11      | nudix nucleoside diphosphate linked moiety X-type motif 19                                                                          |
| NUP155  | 9631     | 5   | 5p13.1        | nucleoporin 155kDa                                                                                                                  |
| OAF     | 220323   | 11  | 11q23.3       | OAF homolog Drosophila                                                                                                              |
| OLR1    | 4973     | 12  | 12p13.2-p12.3 | oxidized low density lipoprotein lectin-like receptor 1                                                                             |

| Gene         | EntrezID  | Chr | Map           | Definition                                                                                   |
|--------------|-----------|-----|---------------|----------------------------------------------------------------------------------------------|
| ONECUT2      | 9480      | 18  | 18q21.31      | one cut homeobox 2                                                                           |
| OPTN         | 10133     | 10  | 10p13         | optineurin                                                                                   |
| P4HA2        | 8974      | 5   | 5q31          | prolyl 4-hydroxylase alpha polypeptide II                                                    |
| PACS1        | 55690     | 11  | 11q13.1-q13.2 | phosphofurin acidic cluster sorting protein 1                                                |
| PAX1         | 5075      | 20  | 20p11.2       | paired box 1                                                                                 |
| PCMTD2       | 55251     | 20  | 20q13.33      | protein-L-isoaspartate D-aspartate O-methyltransferase domain containing 2                   |
| PDZK1        | 5174      | 1   | 1q21          | PDZ domain containing 1                                                                      |
| PELP1        | 27043     | 17  | 17p13.2       | proline glutamate and leucine rich protein 1                                                 |
| PI4K2A       | 55361     | 10  | 10q24         | phosphatidylinositol 4-kinase type 2 alpha                                                   |
| PIGB         | 9488      | 15  | 15q21.3       | phosphatidylinositol glycan anchor biosynthesis class B                                      |
| PIGM         | 93183     | 1   | 1q23.2        | phosphatidylinositol glycan anchor biosynthesis class M                                      |
| PLCB4        | 5332      | 20  | 20p12         | phospholipase C beta 4                                                                       |
| PLEKHB1      | 58473     | 11  | 11q13.5-q14.1 | pleckstrin homology domain containing family B evectins member 1                             |
| PNRC2        | 55629     | 1   | 1p36.11       | proline-rich nuclear receptor coactivator 2                                                  |
| POGZ         | 23126     | 1   | 1q21.3        | pogo transposable element with ZNF domain                                                    |
| POU2F1       | 5451      | 1   | 1q24.2        | POU class 2 homeobox 1                                                                       |
| POU2F2       | 5452      | 19  | 19q13.2       | POU class 2 homeobox 2                                                                       |
| PPAP2A       | 8611      | 5   | 5q11          | phosphatidic acid phosphatase type 2A                                                        |
| PPARA        | 5465      | 22  | 22q13.31      | peroxisome proliferator-activated receptor alpha                                             |
| PPP4R2       | 151987    | 3   | 3p13          | protein phosphatase 4 regulatory subunit 2                                                   |
| PQLC3        | 130814    | 2   | 2p25.1        | PQ loop repeat containing 3                                                                  |
| PRDM1        | 639       | 6   | 6q21          | PR domain containing 1 with ZNF domain                                                       |
| PRG4         | 10216     | 1   | 1q25-q31      | proteoglycan 4                                                                               |
| PRKD3        | 23683     | 2   | 2p21          | protein kinase D3                                                                            |
| PRRX1        | 5396      | 1   | 1q24          | paired related homeobox 1                                                                    |
| PRTG         | 283659    | 15  | 15q21.3       | protogenin                                                                                   |
| PTPRK        | 5796      | 6   | 6q22.2-q22.3  | protein tyrosine phosphatase receptor type K                                                 |
| PXDN         | 7837      | 2   | 2p25          | peroxidasin homolog Drosophila                                                               |
| QARS         | 5859      | 3   | 3p21.31       | glutamyl-tRNA synthetase                                                                     |
| RAB34        | 83871     | 17  | 17q11.2       | RAB34 member RAS oncogene family                                                             |
| RAB8B        | 51762     | 15  | 15q22.2       | RAB8B member RAS oncogene family                                                             |
| RABGAP1      | 23637     | 9   | 9q34.11       | RAB GTPase activating protein 1                                                              |
| RASSF8       | 11228     | 12  | 12p12.3       | Ras association RalGDS/AF-6 domain family N-terminal member 8                                |
| RBFOX2       | 23543     | 22  | 22q13.1       | RNA binding protein fox-1 homolog C. elegans 2                                               |
| RCC2         | 55920     | 1   | 1p36.13       | regulator of chromosome condensation 2                                                       |
| REST         | 5978      | 4   | 4q12          | RE1-silencing transcription factor                                                           |
| RHAG         | 6005      | 6   | 6p12.3        | Rh-associated glycoprotein                                                                   |
| RHOH         | 399       | 4   | 4p13          | ras homolog family member H                                                                  |
| RHOV         | 171177    | 15  | 15q13.3       | ras homolog family member V                                                                  |
| RNF103-CHMP3 | 100526767 | 2   | 2p            | RNF103-CHMP3 readthrough                                                                     |
| RNF146       | 81847     | 6   | 6q22.1-q22.33 | ring finger protein 146                                                                      |
| RNF44        | 22838     | 5   | 5q35.2        | ring finger protein 44                                                                       |
| RYBP         | 23429     | 3   | 3p13          | RING1 and YY1 binding protein                                                                |
| SCD5         | 79966     | 4   | 4q21.22       | stearoyl-CoA desaturase 5                                                                    |
| SDC1         | 6382      | 2   | 2p24.1        | syndecan 1                                                                                   |
| SEC23IP      | 11196     | 10  | 10q25-q26     | SEC23 interacting protein                                                                    |
| SERAC1       | 84947     | 6   | 6q25.3        | serine active site containing 1                                                              |
| SERINC5      | 256987    | 5   | 5q14.1        | serine incorporator 5                                                                        |
| SERPINB9     | 5272      | 6   | 6p25          | serpin peptidase inhibitor clade B ovalbumin member 9                                        |
| SERPINH1     | 871       | 11  | 11q13.5       | serpin peptidase inhibitor clade H heat shock protein 47 member 1 collagen binding protein 1 |

| Gene     | EntrezID | Chr | Map             | Definition                                                                                    |
|----------|----------|-----|-----------------|-----------------------------------------------------------------------------------------------|
| SFT2D2   | 375035   | 1   | 1q24.2          | SFT2 domain containing 2                                                                      |
| SIRT1    | 23411    | 10  | 10q21.3         | sirtuin 1                                                                                     |
| SLC19A3  | 80704    | 2   | 2q37            | solute carrier family 19 thiamine transporter member 3                                        |
| SLC22A3  | 6581     | 6   | 6q25.3          | solute carrier family 22 organic cation transporter member 3                                  |
| SLC22A5  | 6584     | 5   | 5q23.3          | solute carrier family 22 organic cation/carnitine transporter member 5                        |
| SLC25A30 | 253512   | 13  | 13q14.13        | solute carrier family 25 member 30                                                            |
| SLC2A5   | 6518     | 1   | 1p36.2          | solute carrier family 2 facilitated glucose/fructose transporter member 5                     |
| SLC30A4  | 7782     | 15  | 15q21.1 15q21.1 | solute carrier family 30 zinc transporter member 4                                            |
| SLC35B3  | 51000    | 6   | 6p24.3          | solute carrier family 35 adenosine 3'-phospho 5'-phosphosulfate transporter member B3         |
| SLC35E2  | 9906     | 1   | 1p36.33         | solute carrier family 35 member E2                                                            |
| SLC39A14 | 23516    | 8   | 8p21.3          | solute carrier family 39 zinc transporter member 14                                           |
| SLC7A2   | 6542     | 8   | 8p22            | solute carrier family 7 cationic amino acid transporter y+ system member 2                    |
| SMARCA1  | 6594     | X   | Xq25            | SWI/SNF related matrix associated actin dependent regulator of chromatin subfamily a member 1 |
| SMU1     | 55234    | 9   | 9p12            | smu-1 suppressor of mec-8 and unc-52 homolog <i>C. elegans</i>                                |
| SNAI2    | 6591     | 8   | 8q11            | snail family zinc finger 2                                                                    |
| SNX7     | 51375    | 1   | 1p21.3          | sorting nexin 7                                                                               |
| SOCS5    | 9655     | 2   | 2p21            | suppressor of cytokine signaling 5                                                            |
| SOD2     | 6648     | 6   | 6q25.3          | superoxide dismutase 2 mitochondrial                                                          |
| SPAG9    | 9043     | 17  | 17q21.33        | sperm associated antigen 9                                                                    |
| SPI1     | 6688     | 11  | 11p11.2         | spleen focus forming virus SFFV proviral integration oncogene                                 |
| SPON2    | 10417    | 4   | 4p16.3          | spondin 2 extracellular matrix protein                                                        |
| SPTBN1   | 6711     | 2   | 2p21            | spectrin beta non-erythrocytic 1                                                              |
| SRF      | 6722     | 6   | 6p21.1          | serum response factor c-fos serum response element-binding transcription factor               |
| STK3     | 6788     | 8   | 8q22.2          | serine/threonine kinase 3                                                                     |
| STMN1    | 3925     | 1   | 1p36.11         | stathmin 1                                                                                    |
| STX6     | 10228    | 1   | 1q25.3          | syntaxin 6                                                                                    |
| SUMF2    | 25870    | 7   | 7q11.1          | sulfatase modifying factor 2                                                                  |
| SUMO1    | 7341     | 2   | 2q33            | small ubiquitin-like modifier 1                                                               |
| SYAP1    | 94056    | X   | Xp22.2          | synapse associated protein 1                                                                  |
| SYNE1    | 23345    | 6   | 6q25            | spectrin repeat containing nuclear envelope 1                                                 |
| SYNE2    | 23224    | 14  | 14q23.2         | spectrin repeat containing nuclear envelope 2                                                 |
| SYNGR2   | 9144     | 17  | 17q25.3         | synaptogyrin 2                                                                                |
| SYPL1    | 6856     | 7   | 7q22.3          | synaptophysin-like 1                                                                          |
| TAGLN    | 6876     | 11  | 11q23.2         | transgelin                                                                                    |
| TAL1     | 6886     | 1   | 1p32            | T-cell acute lymphocytic leukemia 1                                                           |
| TAOK1    | 57551    | 17  | 17q11.2         | TAO kinase 1                                                                                  |
| TBC1D9   | 23158    | 4   | 4q31.21         | TBC1 domain family member 9 with GRAM domain                                                  |
| TBPL1    | 9519     | 6   | 6q22.1-q22.3    | TBP-like 1                                                                                    |
| TC2N     | 123036   | 14  | 14q32.12        | tandem C2 domains nuclear                                                                     |
| TCL1B    | 9623     | 14  | 14q32.1         | T-cell leukemia/lymphoma 1B                                                                   |
| TESK2    | 10420    | 1   | 1p32            | testis-specific kinase 2                                                                      |
| TFRC     | 7037     | 3   | 3q29            | transferrin receptor                                                                          |
| TGFBI    | 7045     | 5   | 5q31            | transforming growth factor beta-induced 68kDa                                                 |
| TGFBR2   | 7048     | 3   | 3p22            | transforming growth factor beta receptor II 70/80kDa                                          |
| TMEM216  | 51259    | 11  | 11q13.1         | transmembrane protein 216                                                                     |
| TMEM245  | 23731    | 9   | 9q31            | transmembrane protein 245                                                                     |
| TRAK2    | 66008    | 2   | 2q33            | trafficking protein kinesin binding 2                                                         |
| TRIM14   | 9830     | 9   | 9q22.33         | tripartite motif containing 14                                                                |
| TRMT13   | 54482    | 1   | 1p21.2          | tRNA methyltransferase 13 homolog <i>S. cerevisiae</i>                                        |

| Gene    | EntrezID | Chr | Map           | Definition                                                       |
|---------|----------|-----|---------------|------------------------------------------------------------------|
| TRPM7   | 54822    | 15  | 15q21         | transient receptor potential cation channel subfamily M member 7 |
| TRRAP   | 8295     | 7   | 7q21.2-q22.1  | transformation/transcription domain-associated protein           |
| TTC7B   | 145567   | 14  | 14q32.11      | tetratricopeptide repeat domain 7B                               |
| TWISTNB | 221830   | 7   | 7p21.1        | TWIST neighbor                                                   |
| UBE4B   | 10277    | 1   | 1p36.3        | ubiquitination factor E4B                                        |
| UGDH    | 7358     | 4   | 4p15.1        | UDP-glucose 6-dehydrogenase                                      |
| UHMK1   | 127933   | 1   | 1q23.3        | U2AF homology motif UHM kinase 1                                 |
| UMPS    | 7372     | 3   | 3q13          | uridine monophosphate synthetase                                 |
| VAMP5   | 10791    | 2   | 2p11.2        | vesicle-associated membrane protein 5                            |
| VEGFA   | 7422     | 6   | 6p12          | vascular endothelial growth factor A                             |
| VIM     | 7431     | 10  | 10p13         | vimentin                                                         |
| VPS8    | 23355    | 3   | 3q27.2        | vacuolar protein sorting 8 homolog <i>S. cerevisiae</i>          |
| WDR70   | 55100    | 5   | 5p13.2        | WD repeat domain 70                                              |
| WNT6    | 7475     | 2   | 2q35          | wingless-type MMTV integration site family member 6              |
| WNT8A   | 7478     | 5   | 5q31          | wingless-type MMTV integration site family member 8A             |
| XRN2    | 22803    | 20  | 20p11.2-p11.1 | 5'-3' exoribonuclease 2                                          |
| ZBED3   | 84327    | 5   | 5q13.3        | zinc finger BED-type containing 3                                |
| ZFAND1  | 79752    | 8   | 8q21.13       | zinc finger AN1-type domain 1                                    |
| ZMAT4   | 79698    | 8   | 8p11.21       | zinc finger matrin-type 4                                        |
| ZNF407  | 55628    | 18  | 18q23         | zinc finger protein 407                                          |
| ZNF557  | 79230    | 19  | 19p13.2       | zinc finger protein 557                                          |

## References in the supplementary materials

1. Bustin, S.A.; Benes, V.; Garson, J.A.; Hellemans, J.; Huggett, J.; Kubista, M.; Mueller, R.; Nolan, T.; Pfaffl, M.W.; Shipley, G.L.; et al. The MIQE guidelines: Minimum information for publication of quantitative real-time PCR experiments. *Clin. Chem.* **2009**, *55*, 611–622.
2. Huggett, J.F.; Foy, C.A.; Benes, V.; Emslie, K.; Garson, J.A.; Haynes, R.; Hellemans, J.; Kubista, M.; Mueller, R.D.; Nolan, T.; et al. The digital MIQE guidelines: Minimum Information for Publication of Quantitative Digital PCR Experiments. *Clin. Chem.* **2013**, *59*, 892–902.
3. Jung, M.; Schaefer, A.; Steiner, I.; Kempkensteffen, C.; Stephan, C.; Erbersdobler, A.; Jung, K. Robust microRNA stability in degraded RNA preparations from human tissue and cell samples. *Clin. Chem.* **2010**, *56*, 998–1006.
4. Jung, M.; Mollenkopf, H.J.; Grimm, C.; Wagner, I.; Albrecht, M.; Waller, T.; Pilarsky, C.; Johannsen, M.; Stephan, C.; Lehrach, H.; et al. MicroRNA profiling of clear cell renal cell cancer identifies a robust signature to define renal malignancy. *J. Cell. Mol. Med.* **2009**, *13*, 3918–3928.
5. Schaefer, A.; Jung, M.; Mollenkopf, H.J.; Wagner, I.; Stephan, C.; Jentzmik, F.; Miller, K.; Lein, M.; Kristiansen, G.; Jung, K. Diagnostic and prognostic implications of microRNA profiling in prostate carcinoma. *Int. J. Cancer* **2010**, *126*, 1166–1176.
6. Wotschovsky, Z.; Meyer, H.A.; Jung, M.; Fendler, A.; Wagner, I.; Stephan, C.; Busch, J.; Erbersdobler, A.; Disch, A.C.; Mollenkopf, H.J.; et al. Reference genes for the relative quantification of microRNAs in renal cell carcinomas and their metastases. *Anal. Biochem.* **2011**, *417*, 233–241.
7. Chou, C.H.; Chang, N.W.; Shrestha, S.; Hsu, S.D.; Lin, Y.L.; Lee, W.H.; Yang, C.D.; Hong, H.C.; Wei, T.Y.; Tu, S.J.; et al. miRTarBase 2016: Updates to the experimentally validated miRNA-target interactions database. *Nucleic Acids Res.* **2016**, *44*, D239–D247.
8. Dweep, H.; Gretz, N. miRWalk2.0: A comprehensive atlas of microRNA-target interactions. *Nat. Methods* **2015**, *12*, 697. doi: 10.1038/nmeth.3485.
9. Vlachos, I.S.; Paraskevopoulou, M.D.; Karagkouni, D.; Georgakilas, G.; Vergoulis, T.; Kanellos, I.; Anastasopoulos, I.L.; Maniou, S.; Karathanou, K.; Kalfakakou, D.; et al. DIANA-TarBase v7.0: Indexing more than half a million experimentally supported miRNA:mRNA interactions. *Nucleic Acids Res.* **2015**, *43*, D153–D159.

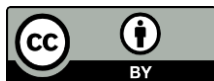

© 2018 by the authors. Licensee MDPI, Basel, Switzerland. This article is an open access article distributed under the terms and conditions of the Creative Commons Attribution (CC BY) license (<http://creativecommons.org/licenses/by/4.0/>).
